# Supplementary material for: Practical Epoxidation of Olefins Using Air and Ubiquitous Iron-Based Fluorous Salen Complex
Source: MDPI journal article supplement (doi:10.3390/molecules29050966), 2024-02-22

# **Practical Epoxidation of Olefins using Air and Ubiquitous Iron-based Fluorous Salen Complex**

**Yamato Kato, Miho Kanoh, Hina Kobayashi, Takayuki Shioiri,  
and Masato Matsugi\***

Faculty of Agriculture, Meijo University, 1-501 Shiogamaguchi, Tempaku, Nagoya 468-8502,  
Japan.

## **Table of contents**

|                                                                       |        |
|-----------------------------------------------------------------------|--------|
| 1. HPLC chromatograms of epoxidation reaction                         | S2, S3 |
| 2. $^1\text{H}$ NMR, $^{13}\text{C}$ NMR, $^{19}\text{F}$ NMR spectra | S4–S32 |

## 1. HPLC chromatograms of epoxidation reaction

HPLC analysis of Air-epoxidation reaction with  $C_4F_9$  Fe(III) salen complex

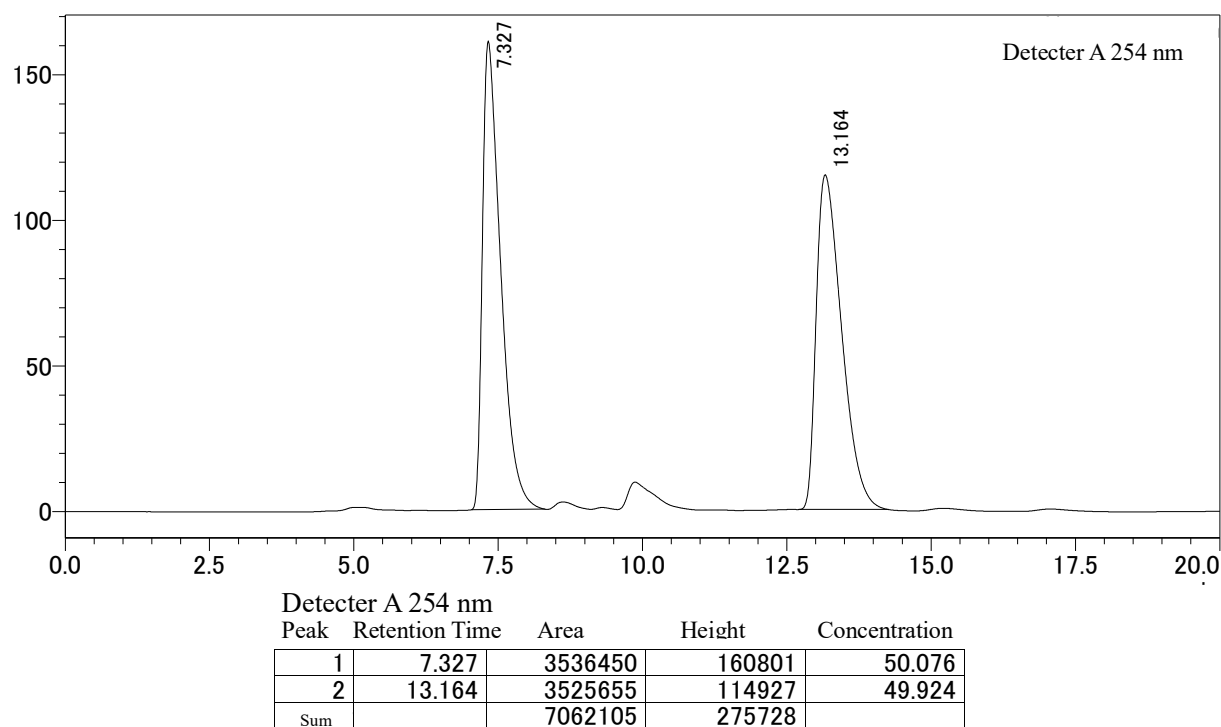

The *ee* of product was determined by HPLC. [254 nm, DAICEL CHIRALCEL OD-3 column, hexane/*i*-PrOH = 9:1, flow rate 0.4 mL/min,  $t_R$  = 7.33 min,  $t_R$  = 13.16 min]

HPLC analysis of Air-epoxidation reaction with  $C_{12}F_{25}$  Fe(III) salen complex

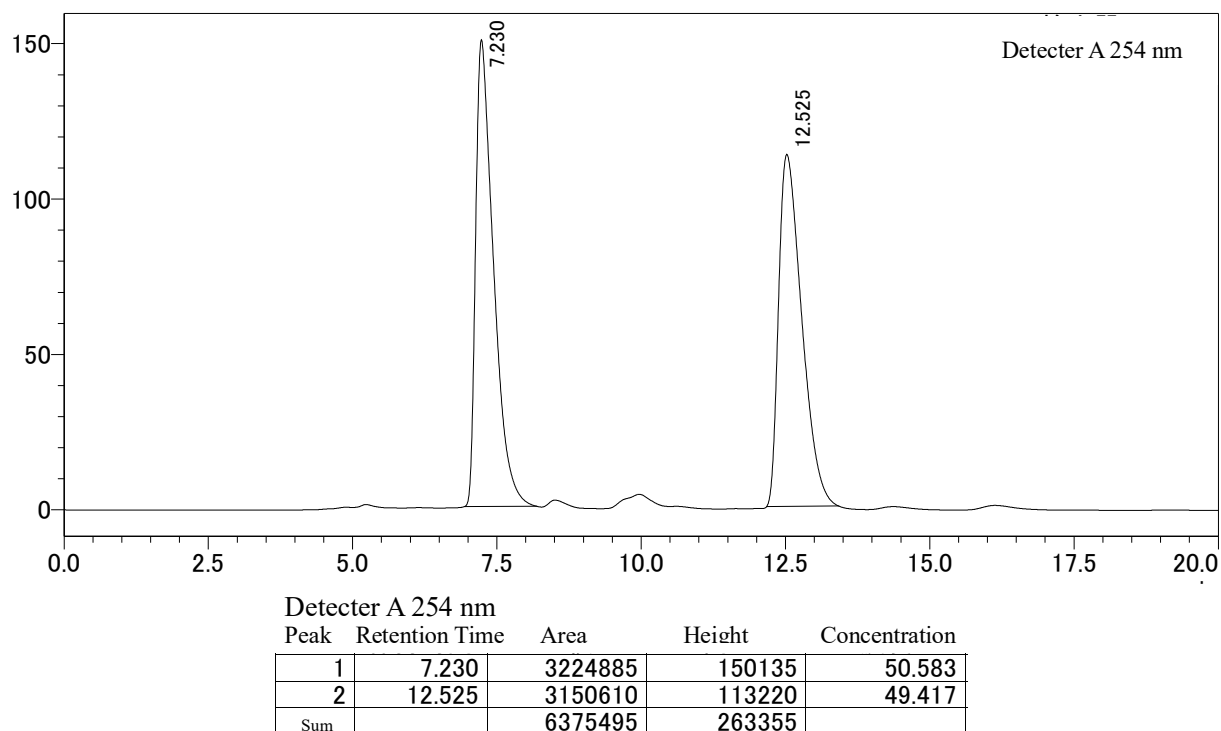

The *ee* of product was determined by HPLC. [254 nm, DAICEL CHIRALCEL OD-3 column, hexane/*i*-PrOH = 9:1, flow rate 0.4 mL/min,  $t_R$  = 7.23 min,  $t_R$  = 12.53 min]

# HPLC analysis of racemic compound

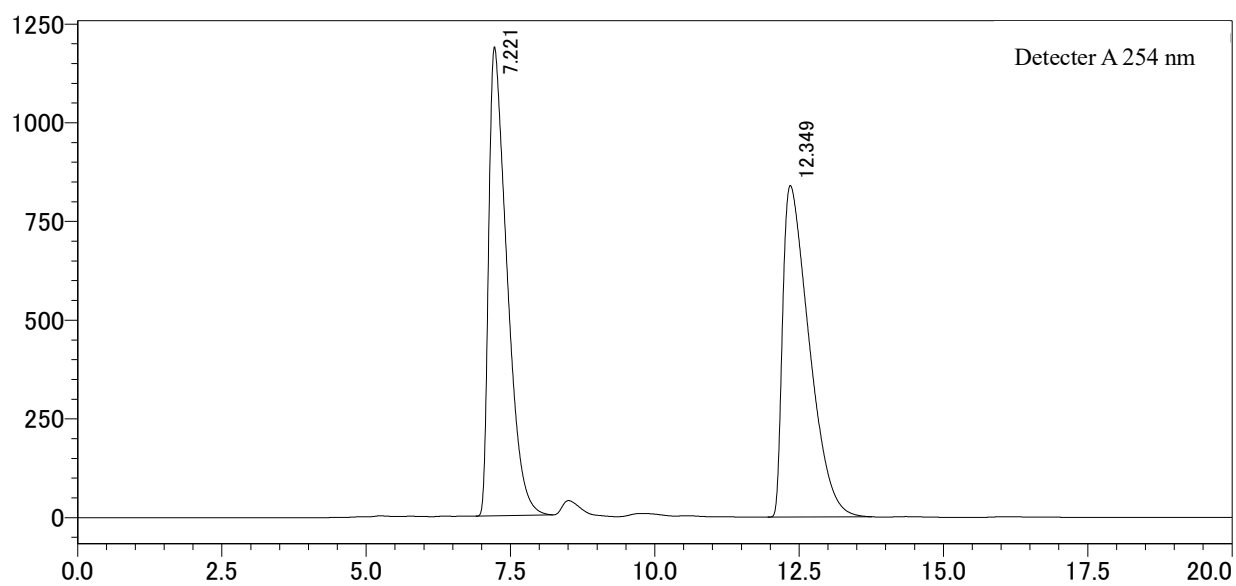

| Detector A 254 nm |                |          |         |               |
|-------------------|----------------|----------|---------|---------------|
| Peak              | Retention Time | Area     | Height  | Concentration |
| 1                 | 7.221          | 26125258 | 1187330 | 49.401        |
| 2                 | 12.349         | 26758401 | 839992  | 50.599        |
| Sum               |                | 52883659 | 2027322 |               |

The *ee* of product was determined by HPLC. [254 nm, DAICEL CHIRALCEL OD-3 column, hexane/*i*-PrOH = 9:1, flow rate 0.4 mL/min,  $t_R$  = 7.22 min,  $t_R$  = 12.35 min]

## 2. $^1\text{H}$ NMR, $^{13}\text{C}$ NMR, $^{19}\text{F}$ NMR spectra

(2)  $^1\text{H}$  NMR, 400 MHz,  $\text{CDCl}_3$

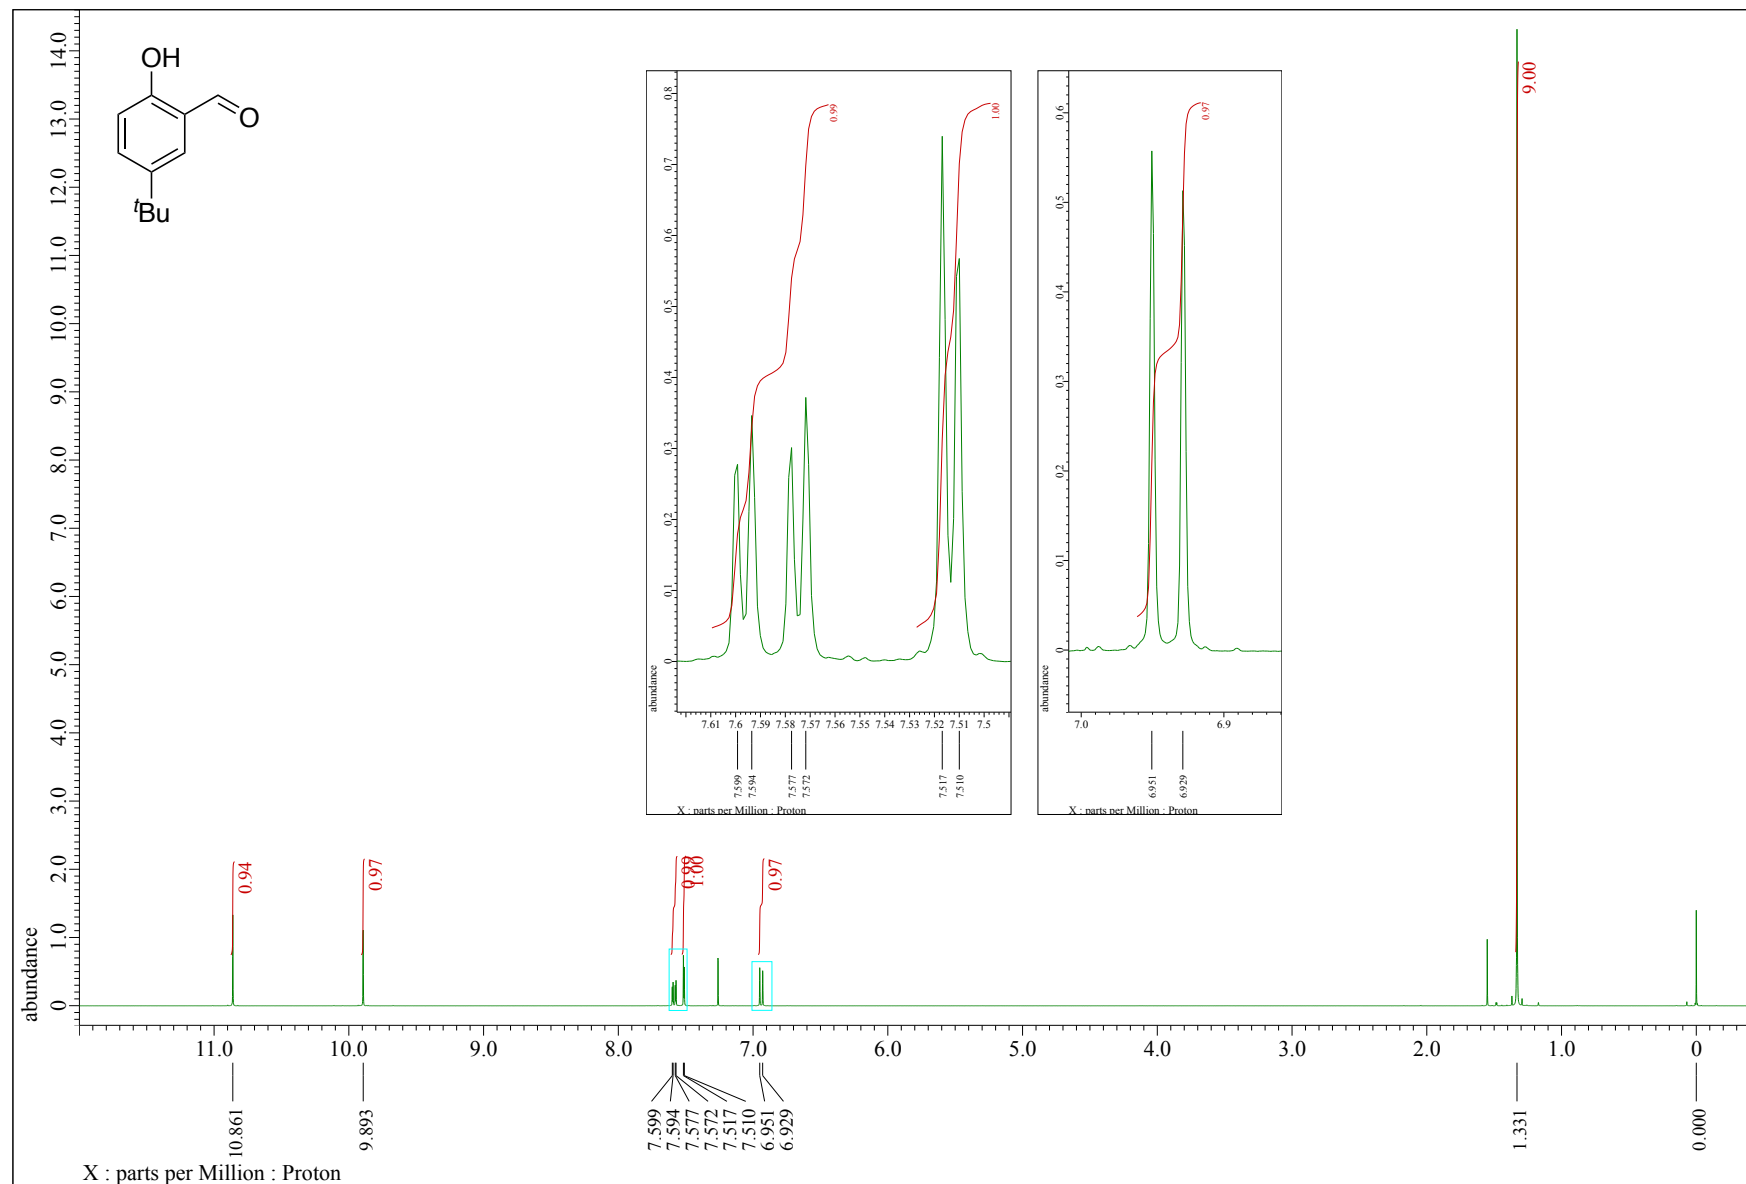

(3a)  $^1\text{H}$  NMR, 400 MHz,  $\text{CDCl}_3$

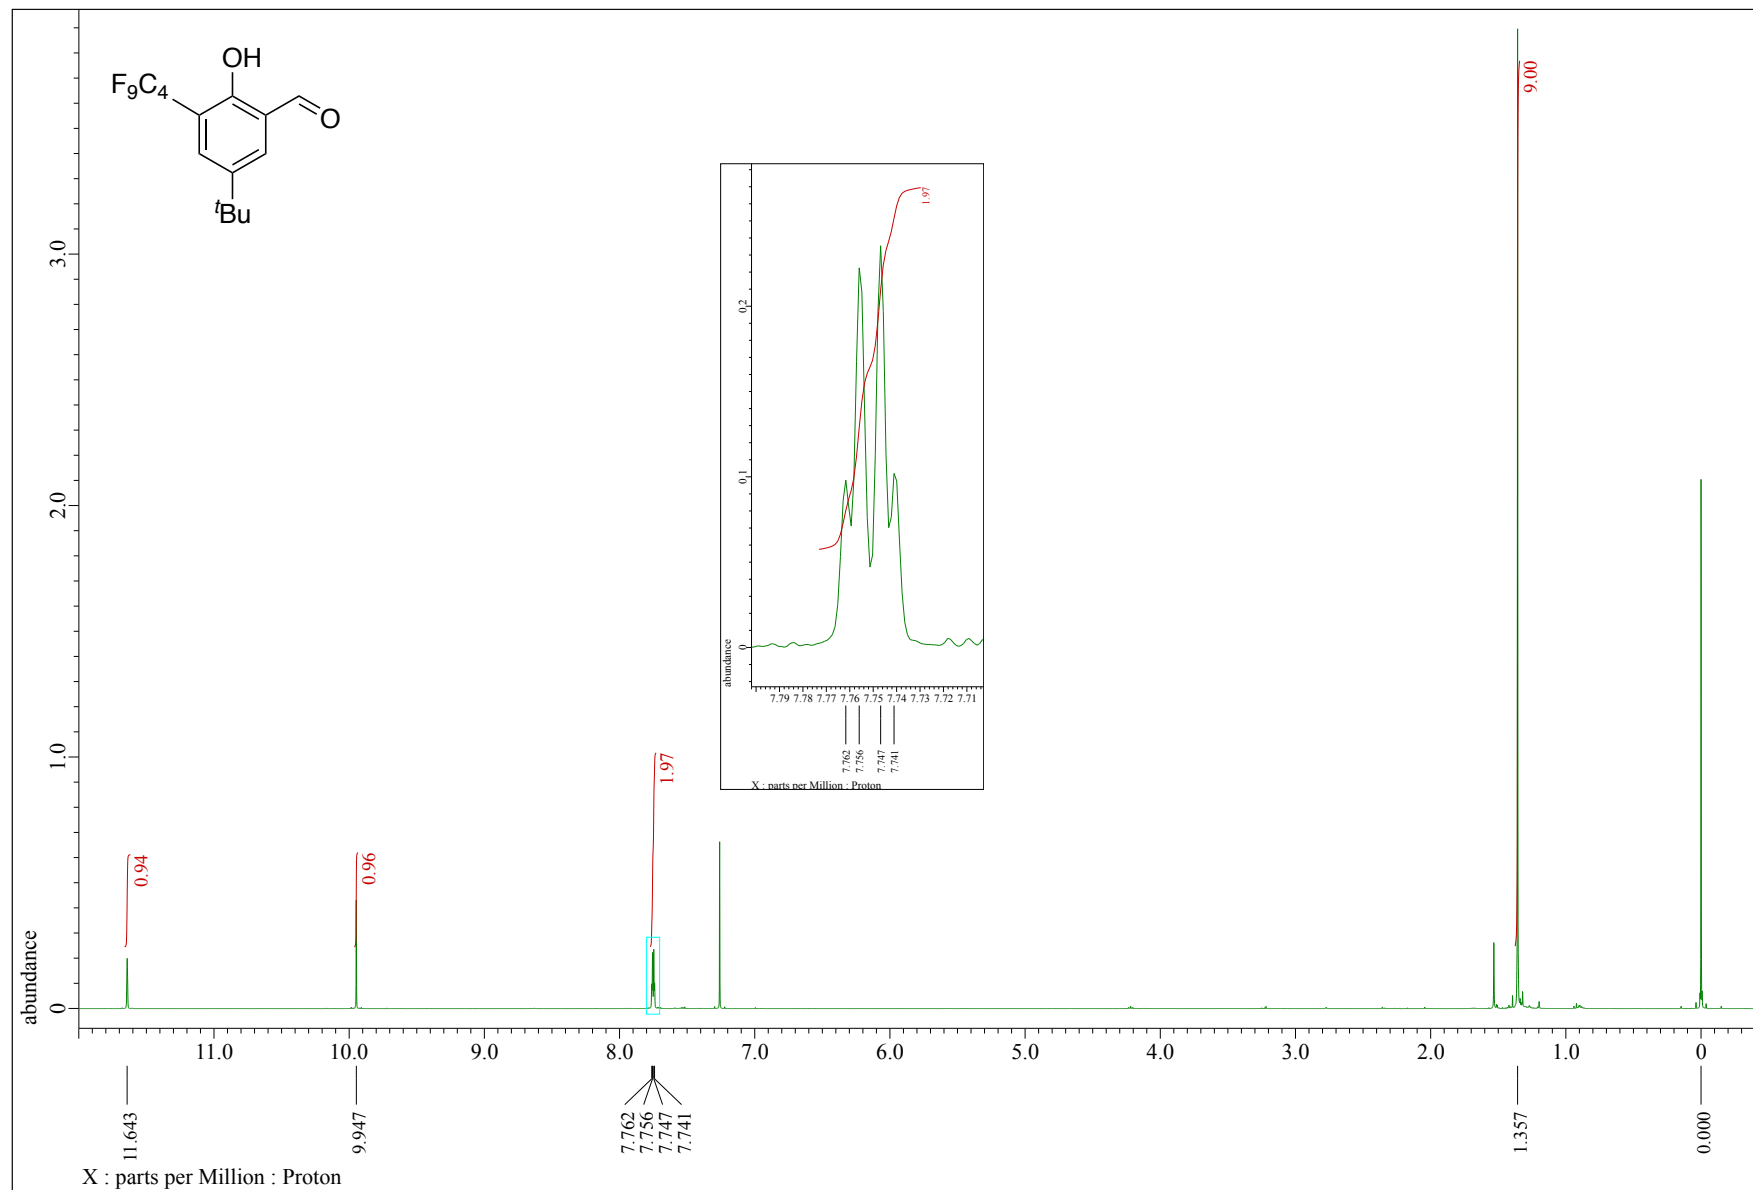

(3a)  $^{19}\text{F}$  NMR, 376 MHz,  $\text{CDCl}_3$

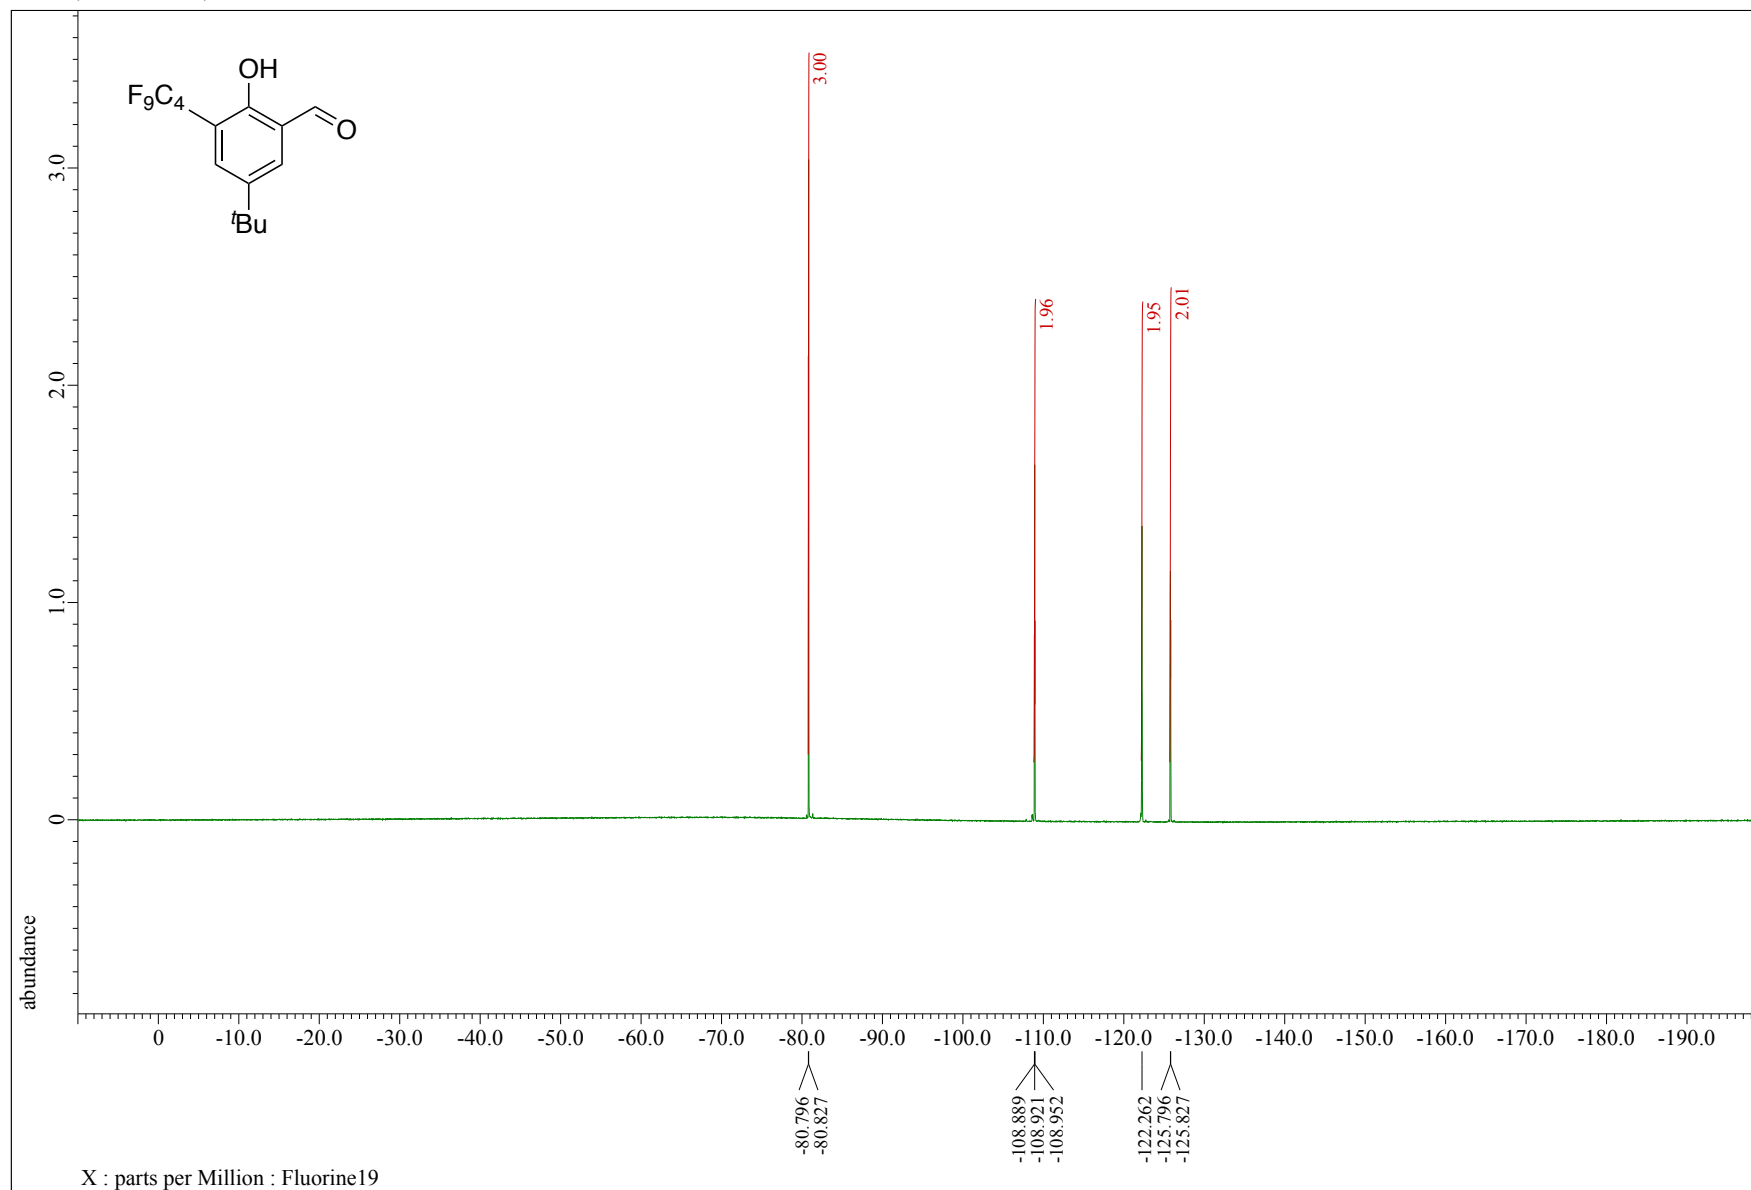

(3b)  $^1\text{H}$  NMR, 400 MHz,  $\text{CDCl}_3$

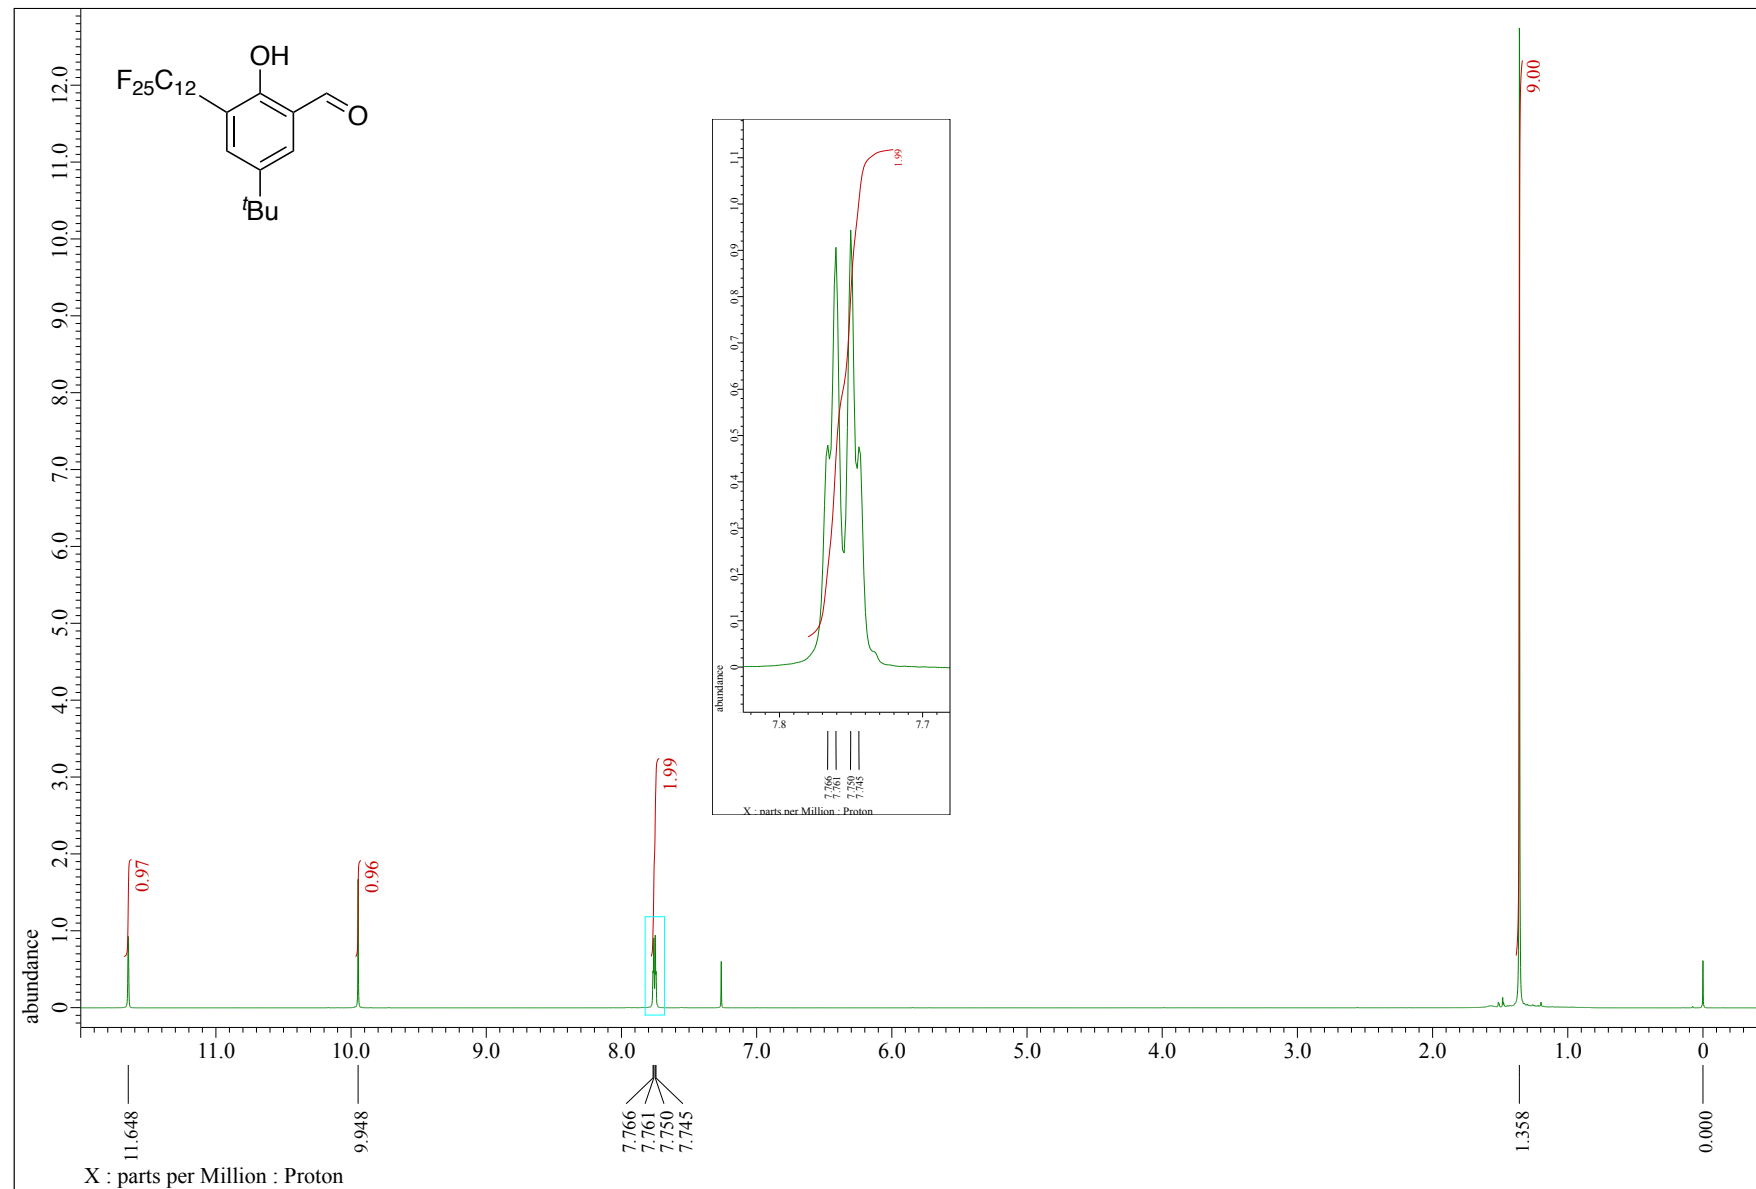

(3b)  $^{13}\text{C}$  NMR, 101 MHz,  $\text{CDCl}_3$

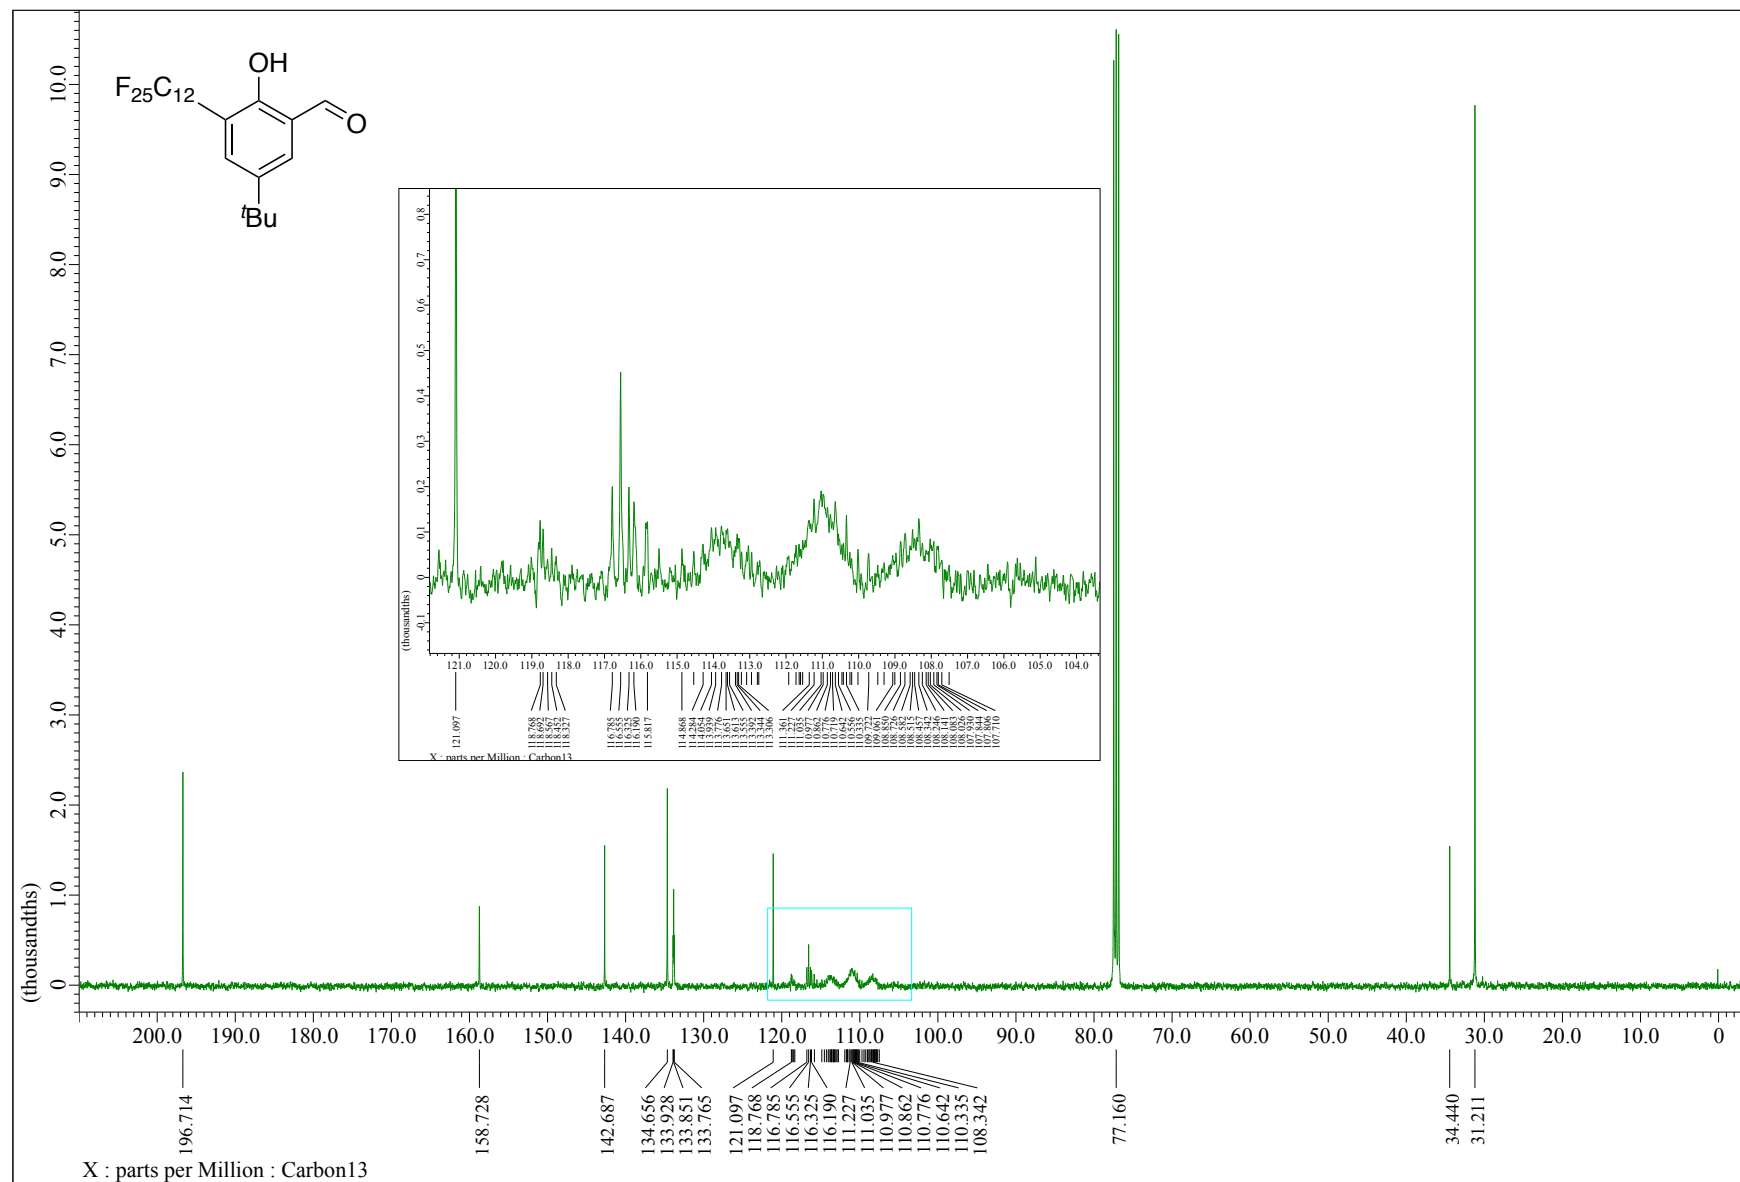



(3b)  $^{19}\text{F}$  NMR, 376 MHz,  $\text{CDCl}_3$

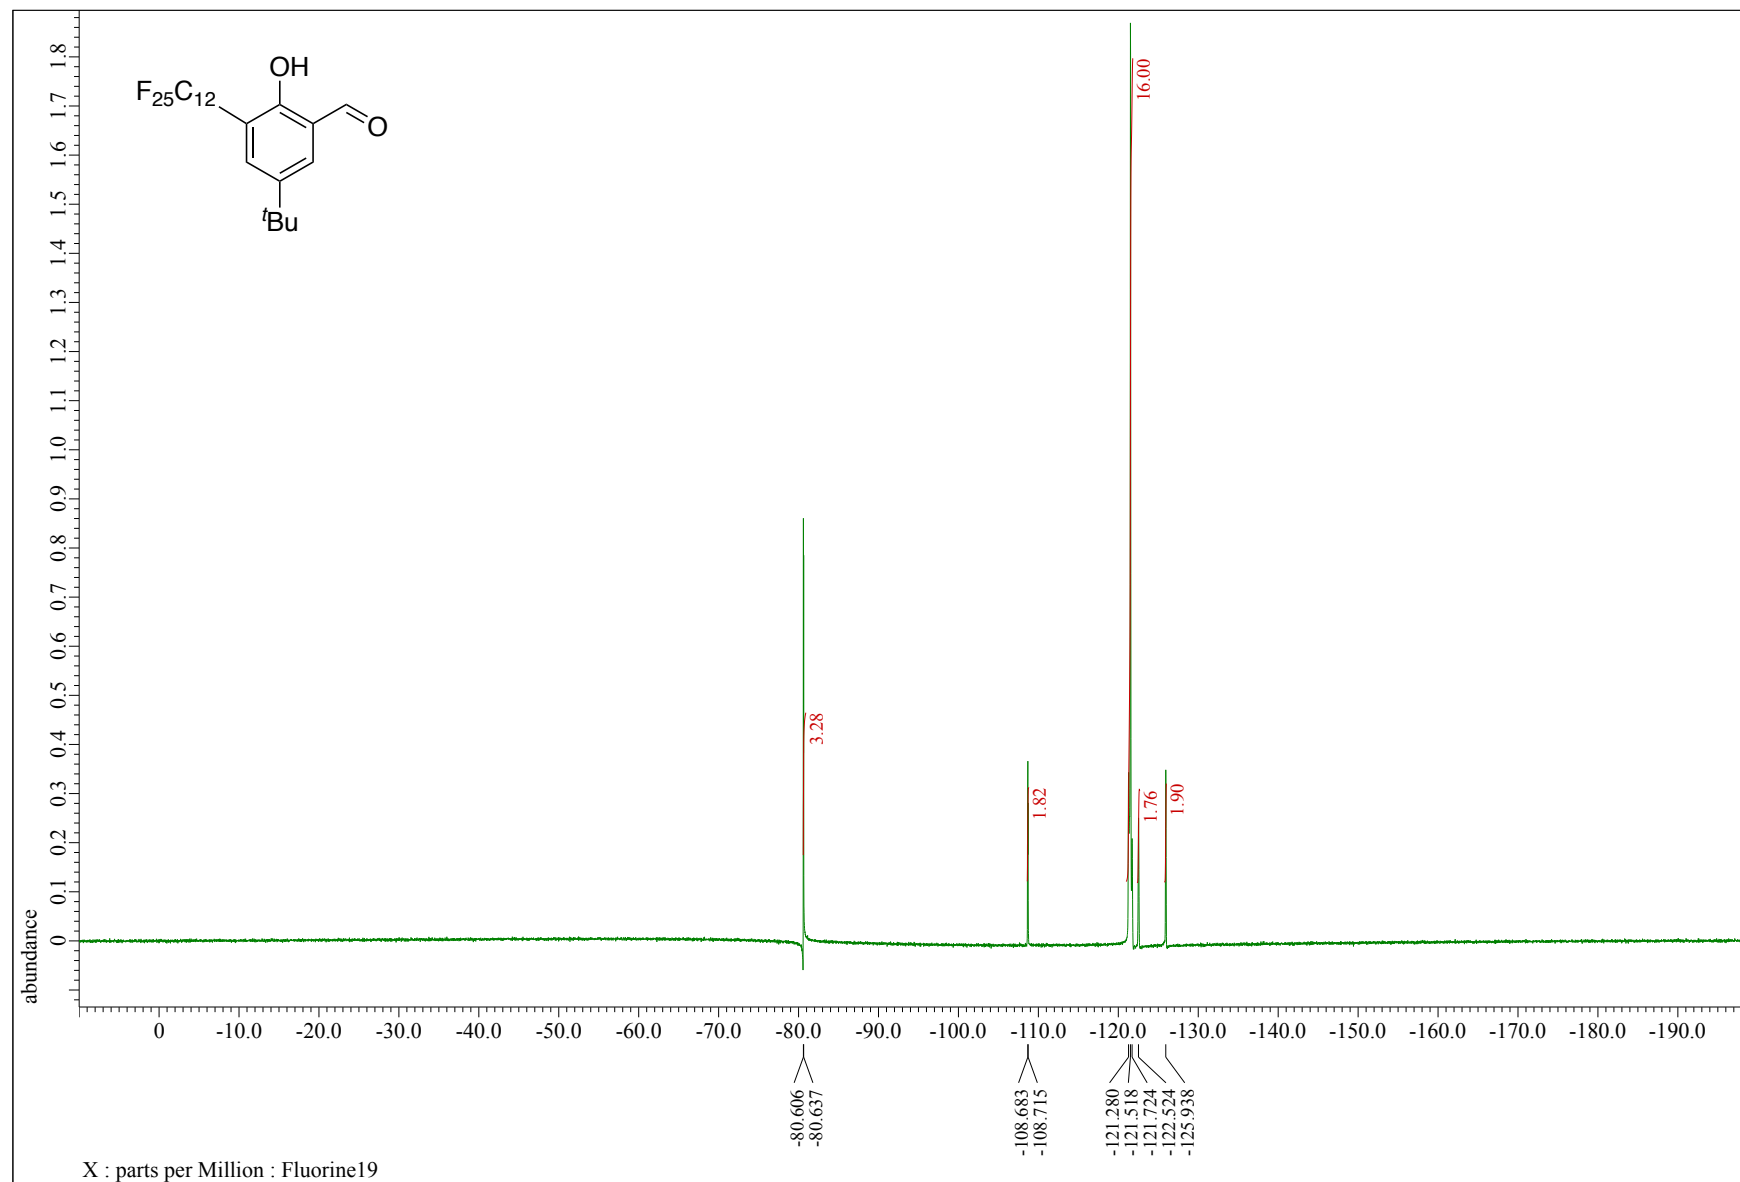

(Ligand of **1b**)  $^1\text{H}$  NMR, 400 MHz,  $\text{CDCl}_3$

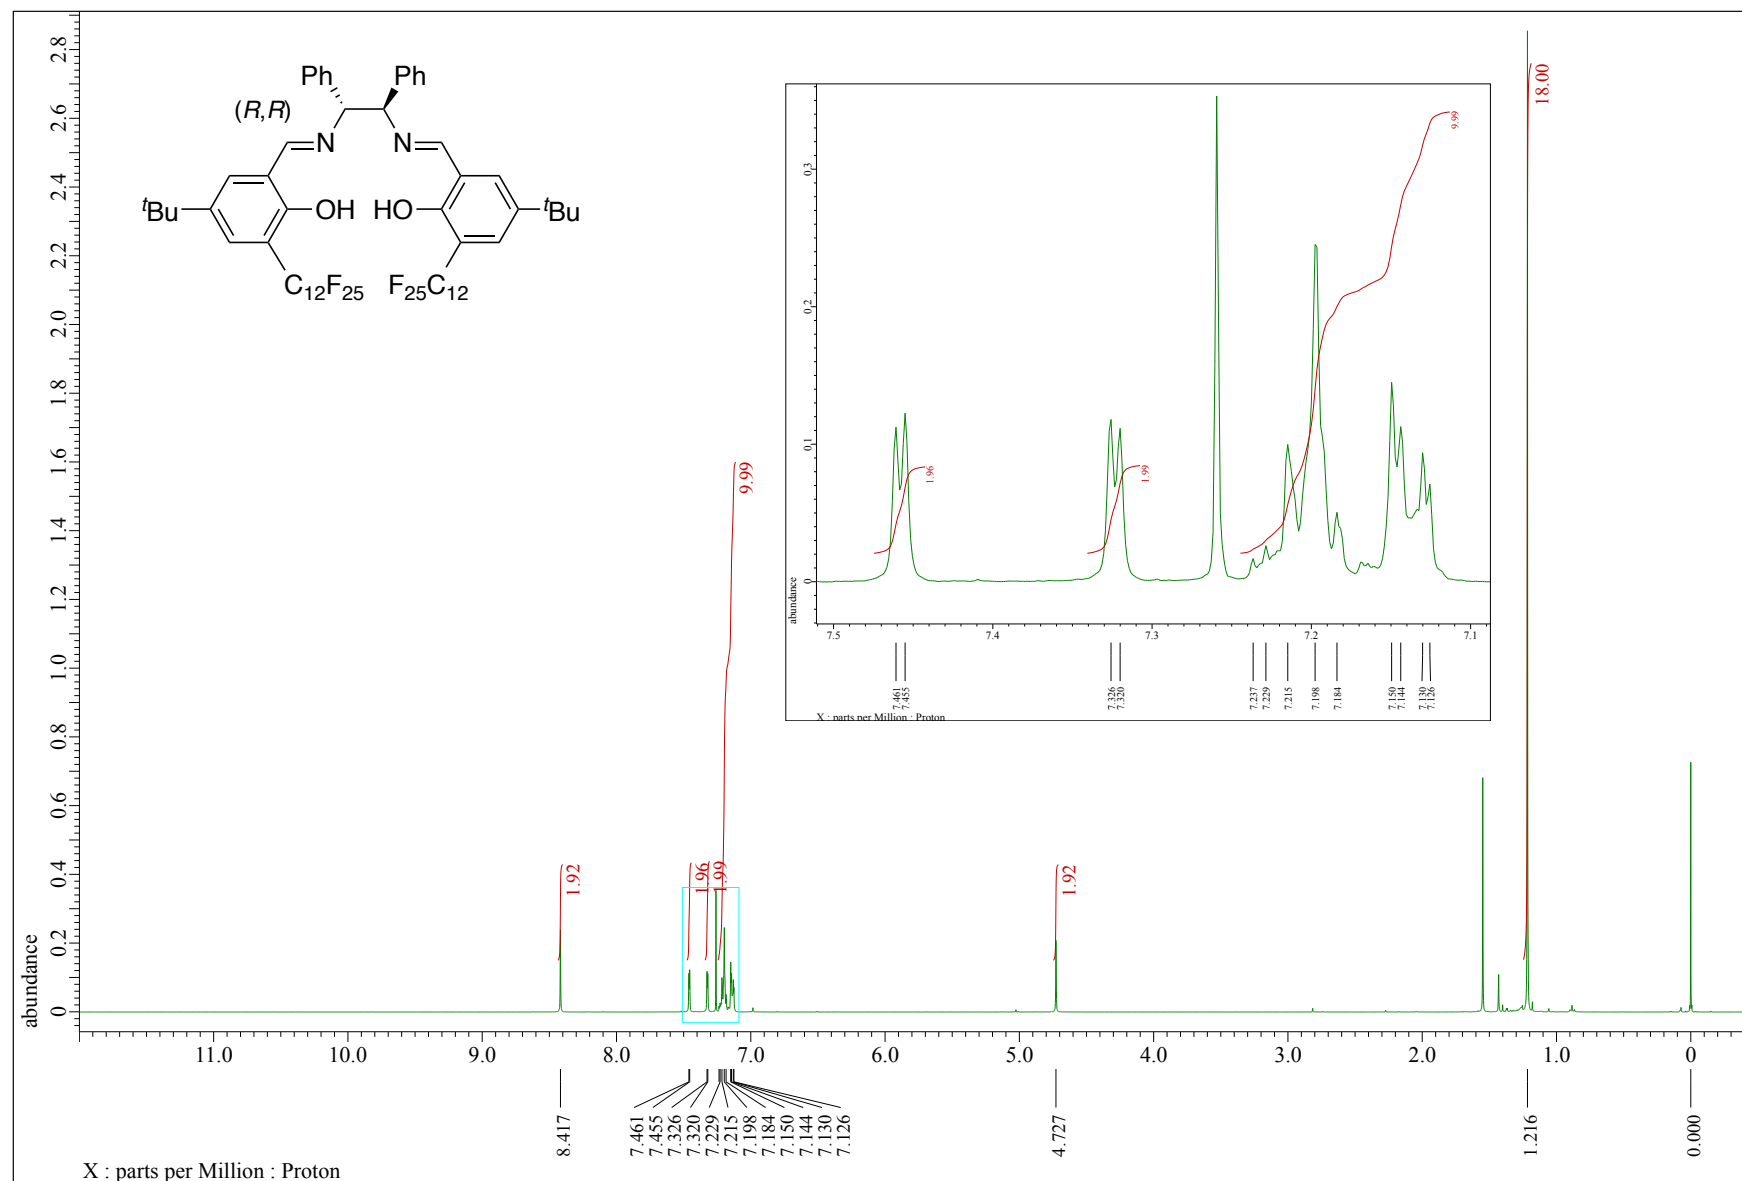

(Ligand of **1b**)  $^{13}\text{C}$  NMR, 101 MHz,  $\text{CDCl}_3$

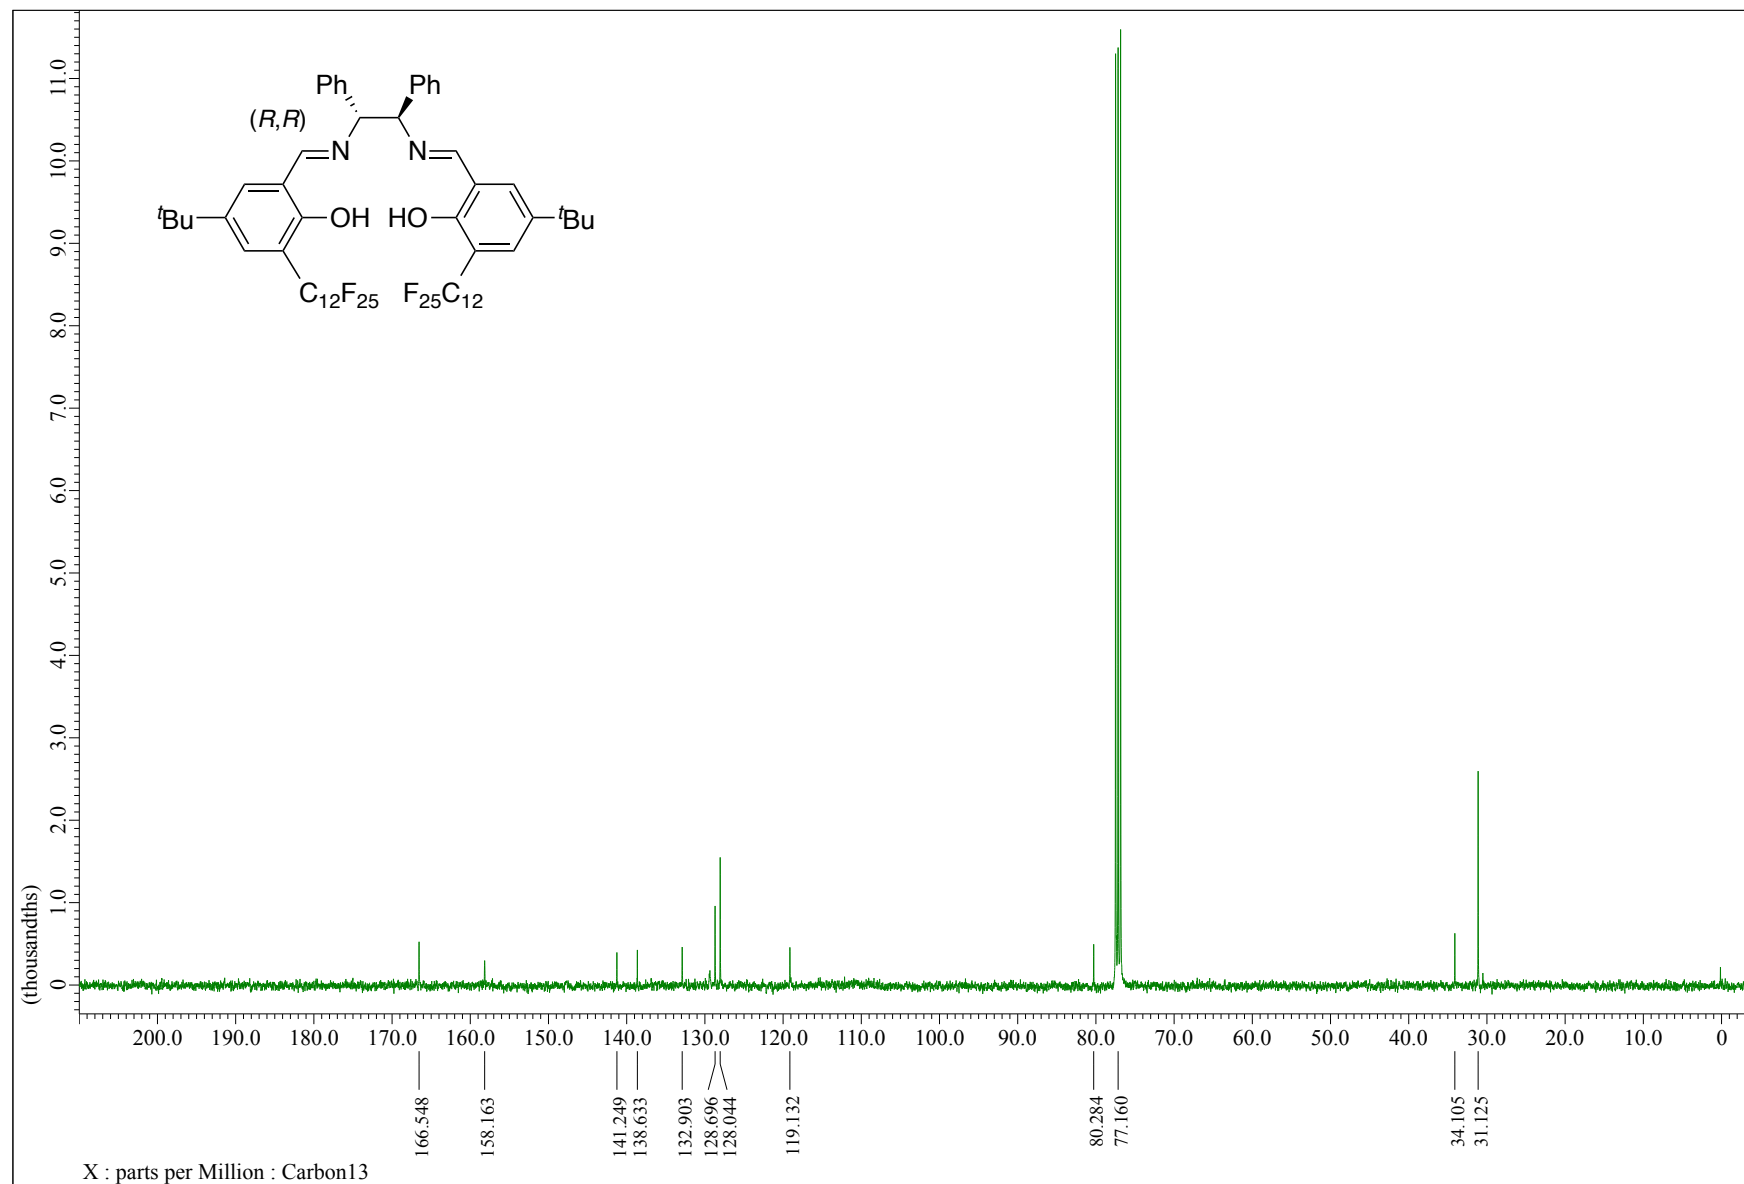

(Ligand of **1b**)  $^{19}\text{F}$  NMR, 376 MHz,  $\text{CDCl}_3$

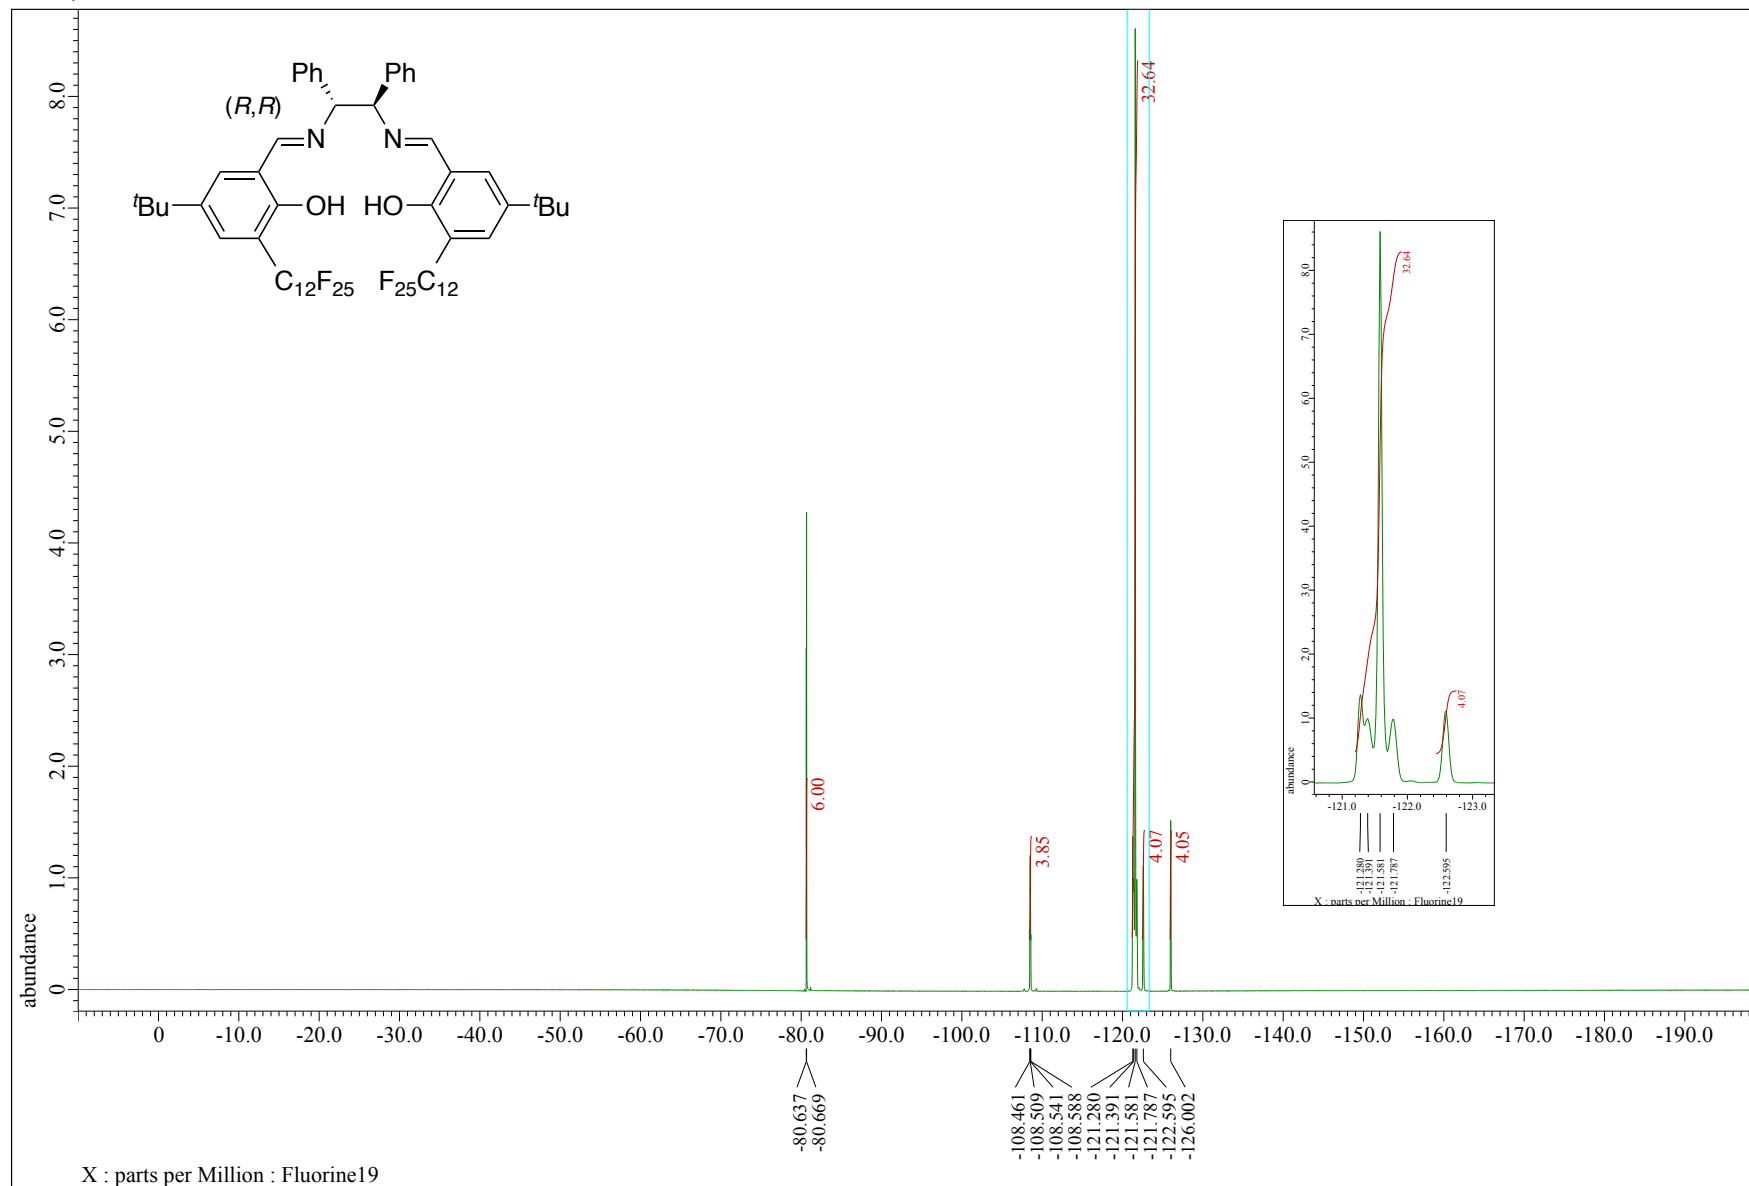

(Ligand of **1c**)  $^1\text{H}$  NMR, 400 MHz,  $\text{CDCl}_3$

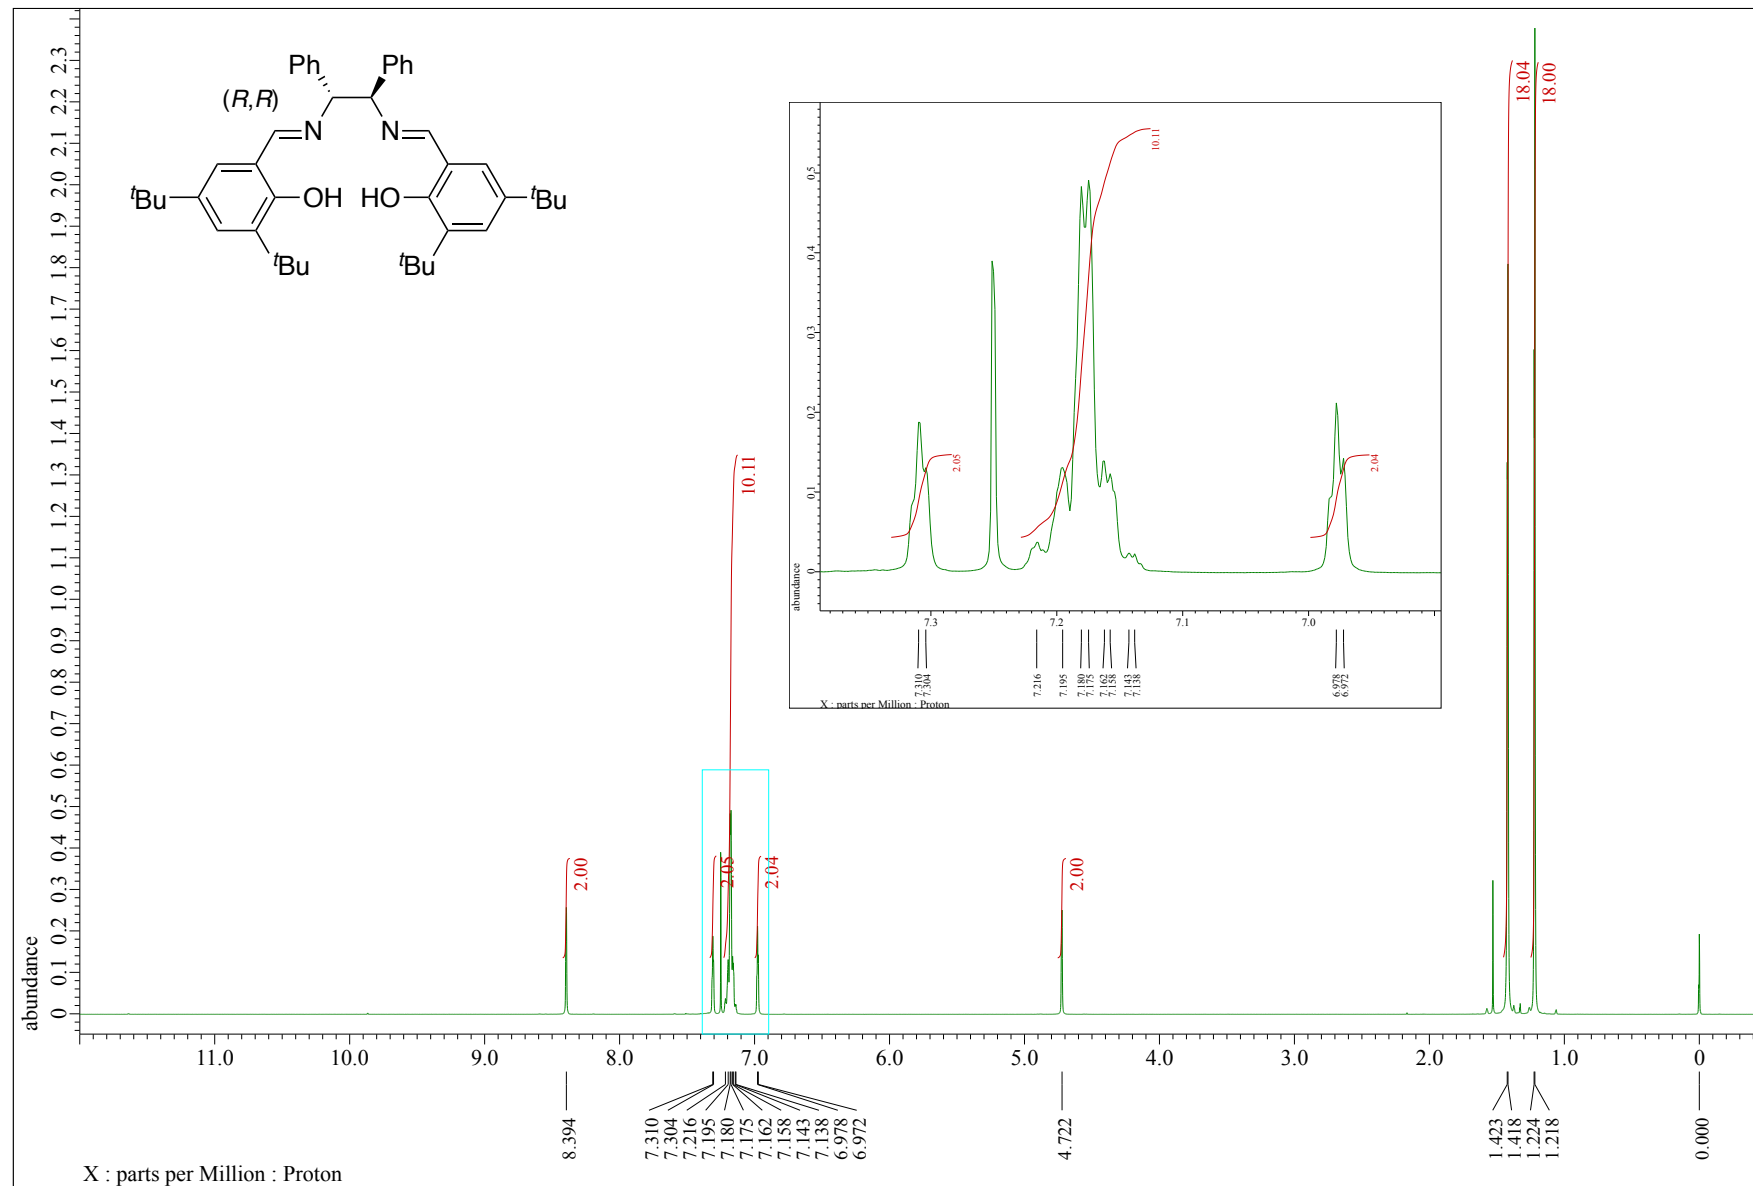

**Table 1, entry 2**  $^1\text{H}$  NMR, 400 MHz,  $\text{CDCl}_3$

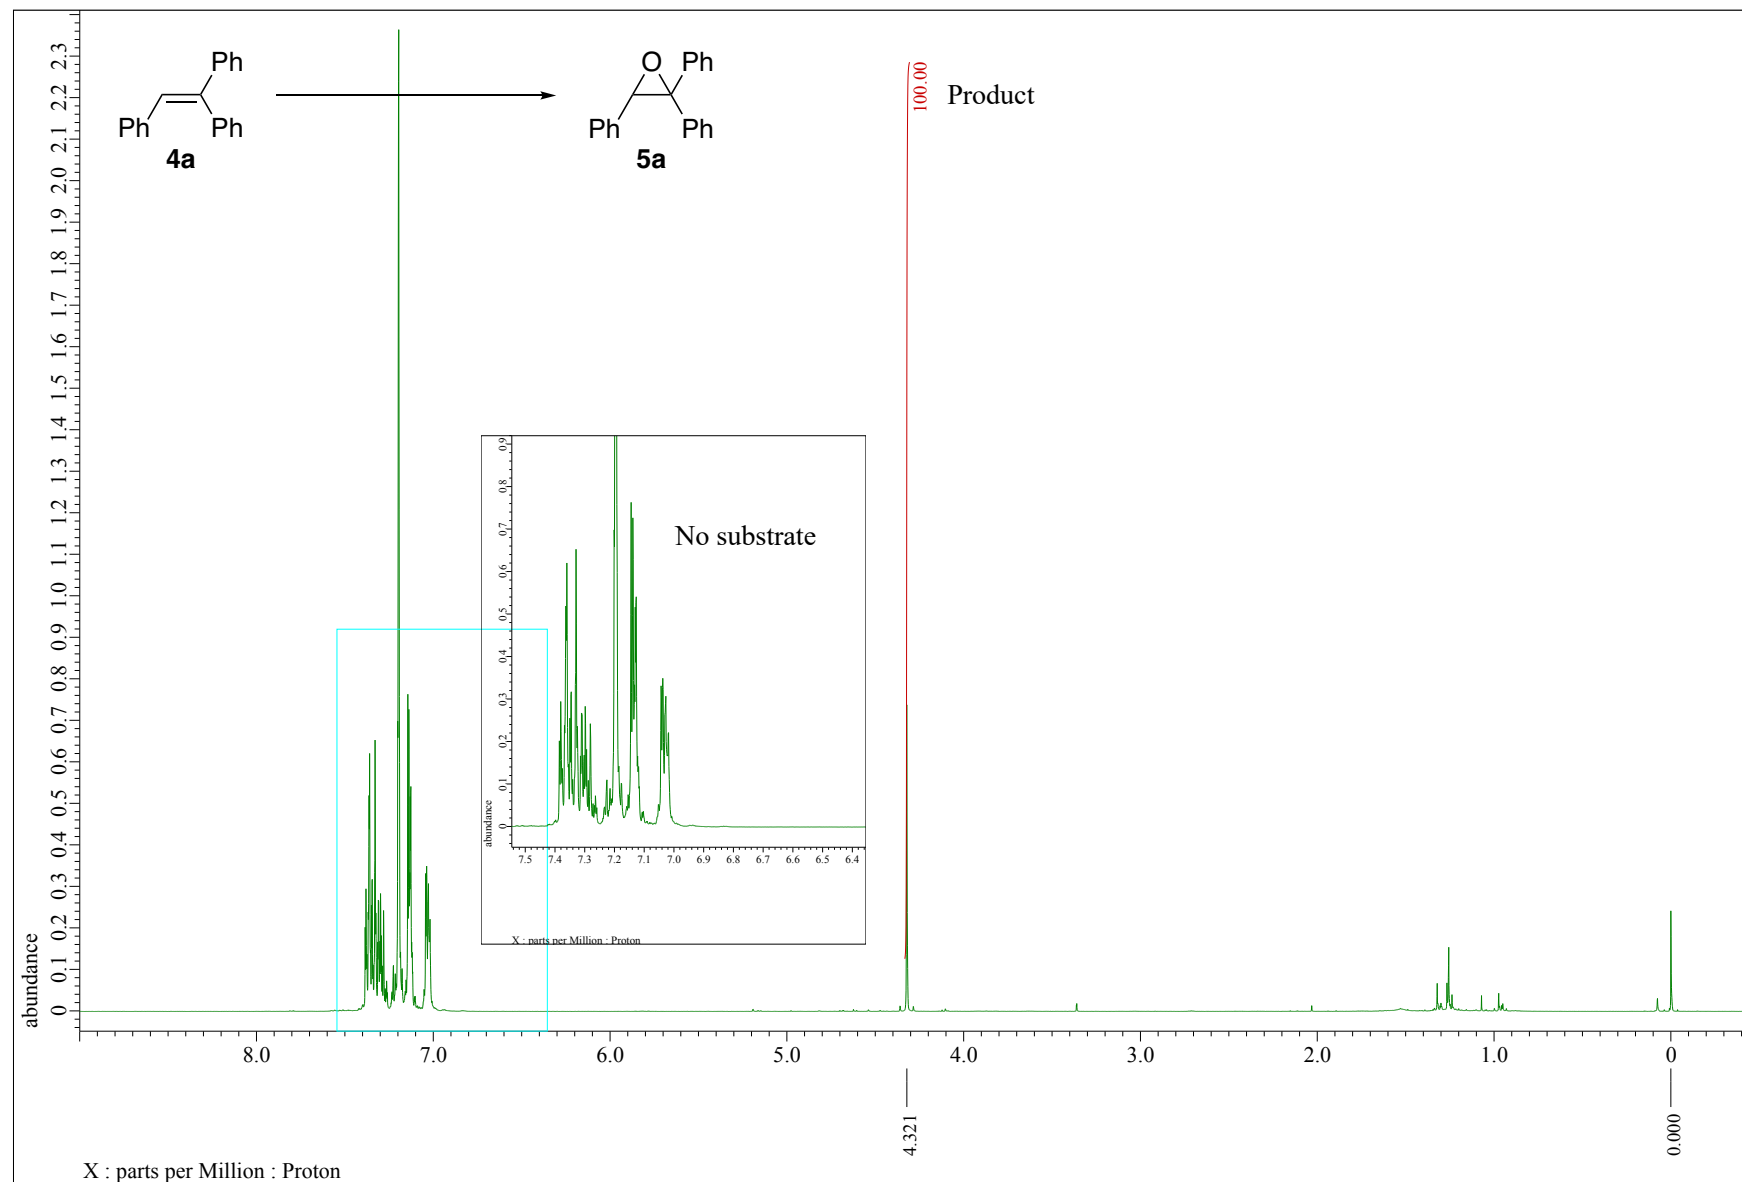

(5a)  $^1\text{H}$  NMR, 400 MHz,  $\text{CDCl}_3$

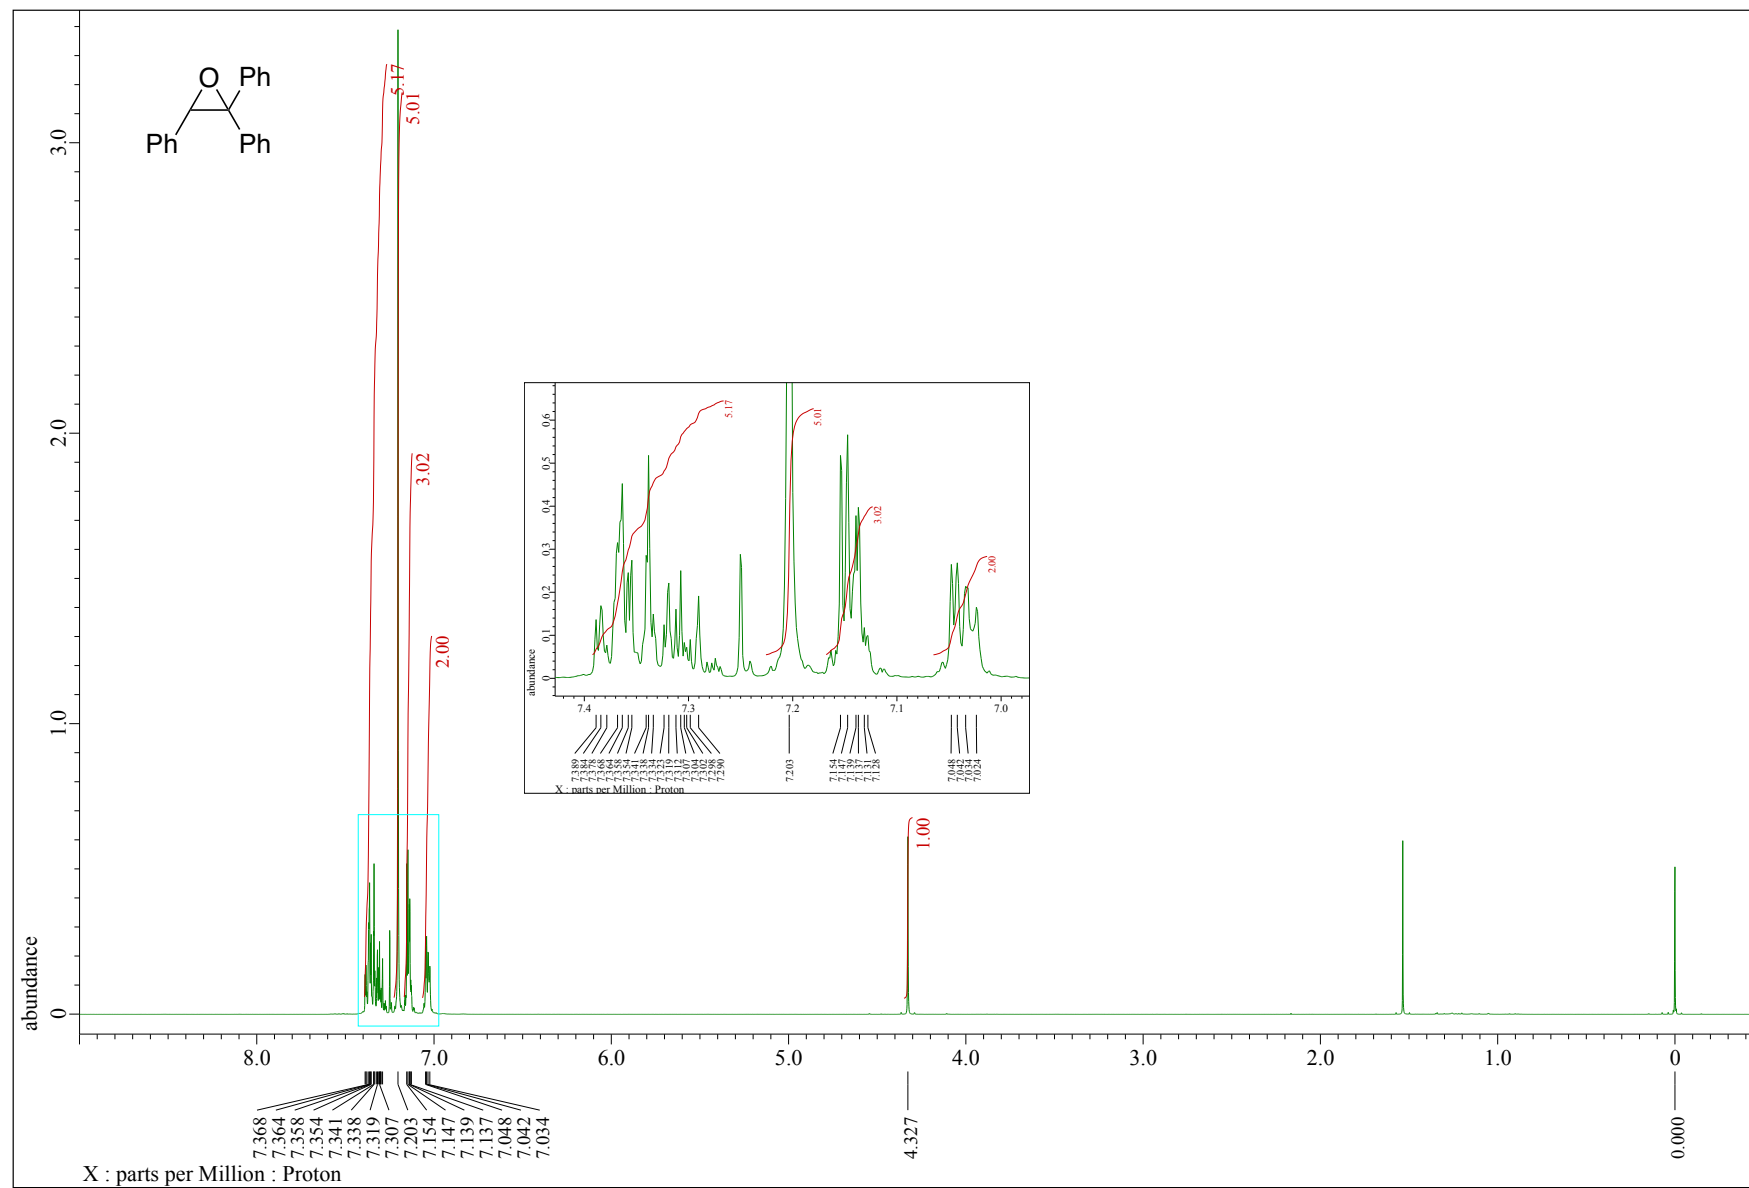

(4e)  $^1\text{H}$  NMR, 400 MHz,  $\text{CDCl}_3$

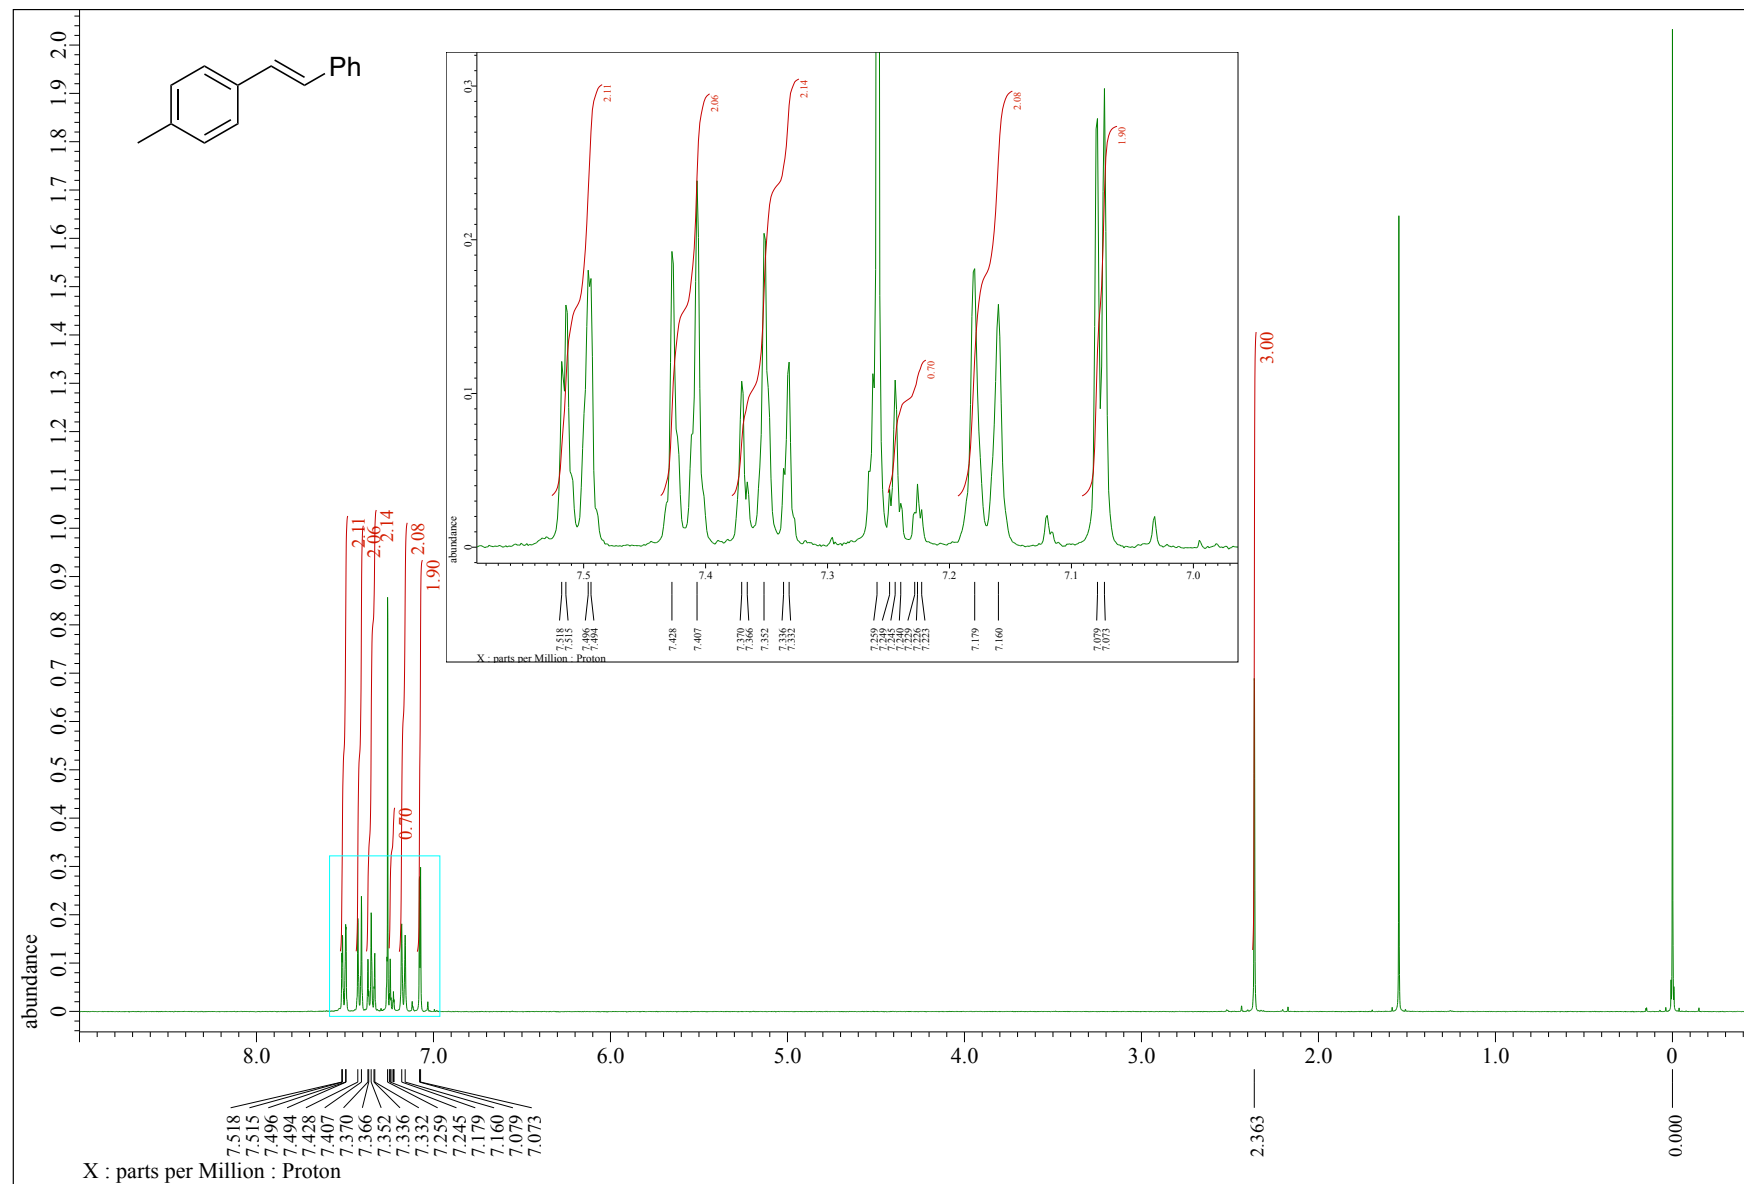



(4f)  $^1\text{H}$  NMR, 400 MHz,  $\text{CDCl}_3$

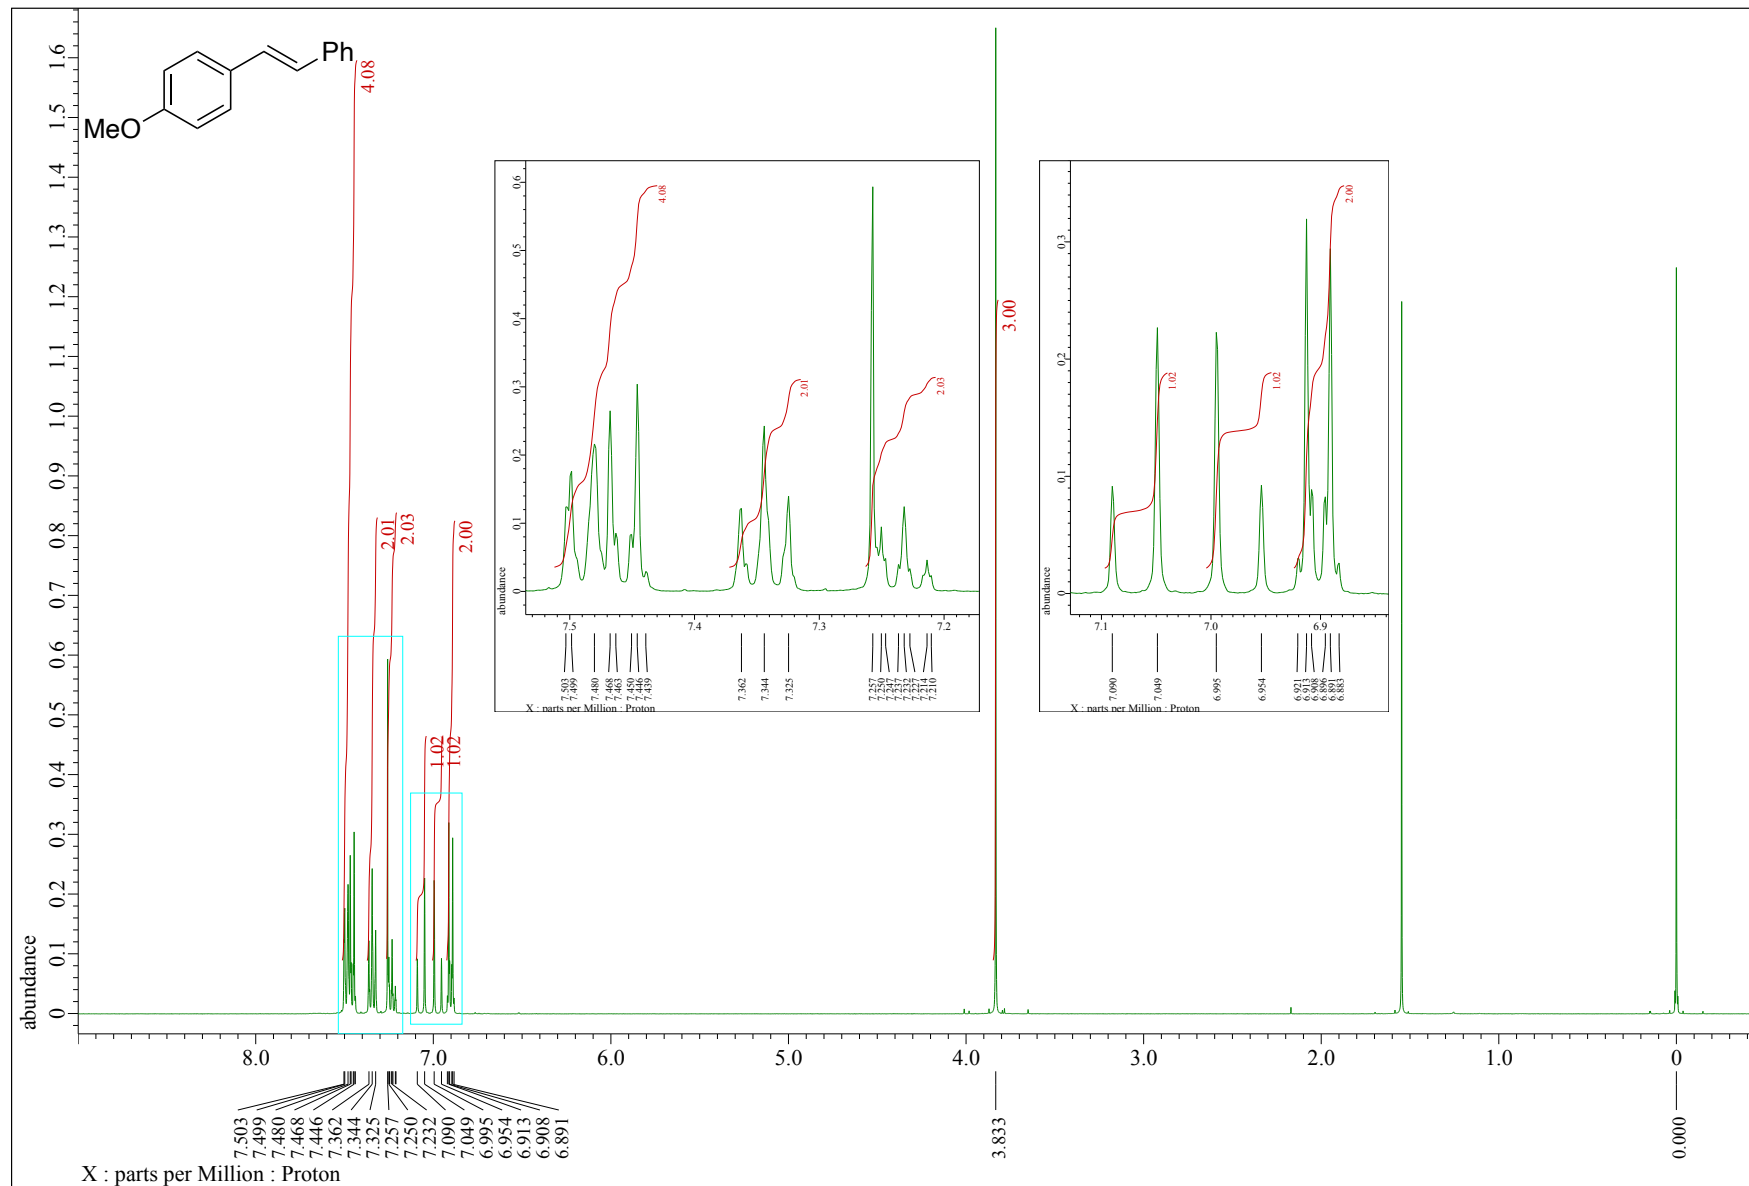

(4g)  $^1\text{H}$  NMR, 400 MHz,  $\text{CDCl}_3$

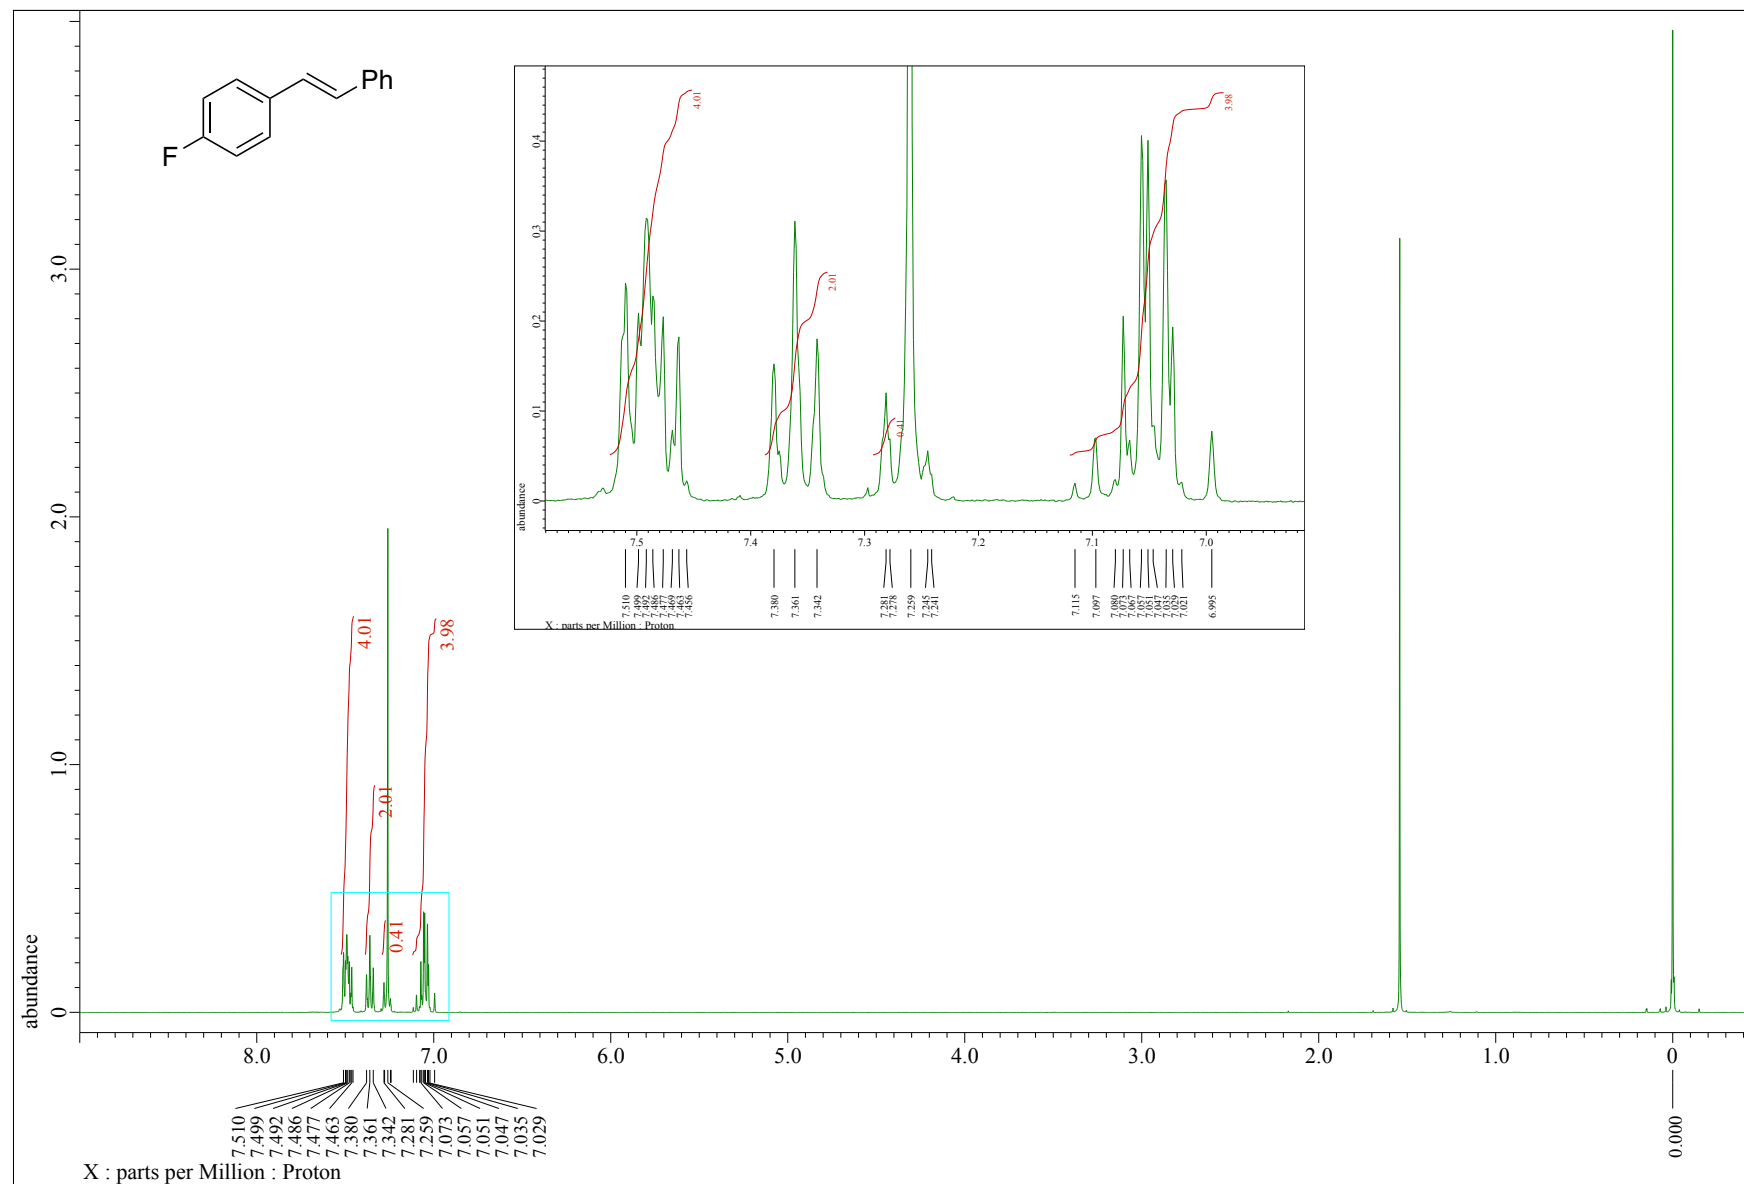

(4g)  $^{19}\text{F}$  NMR, 376 MHz,  $\text{CDCl}_3$

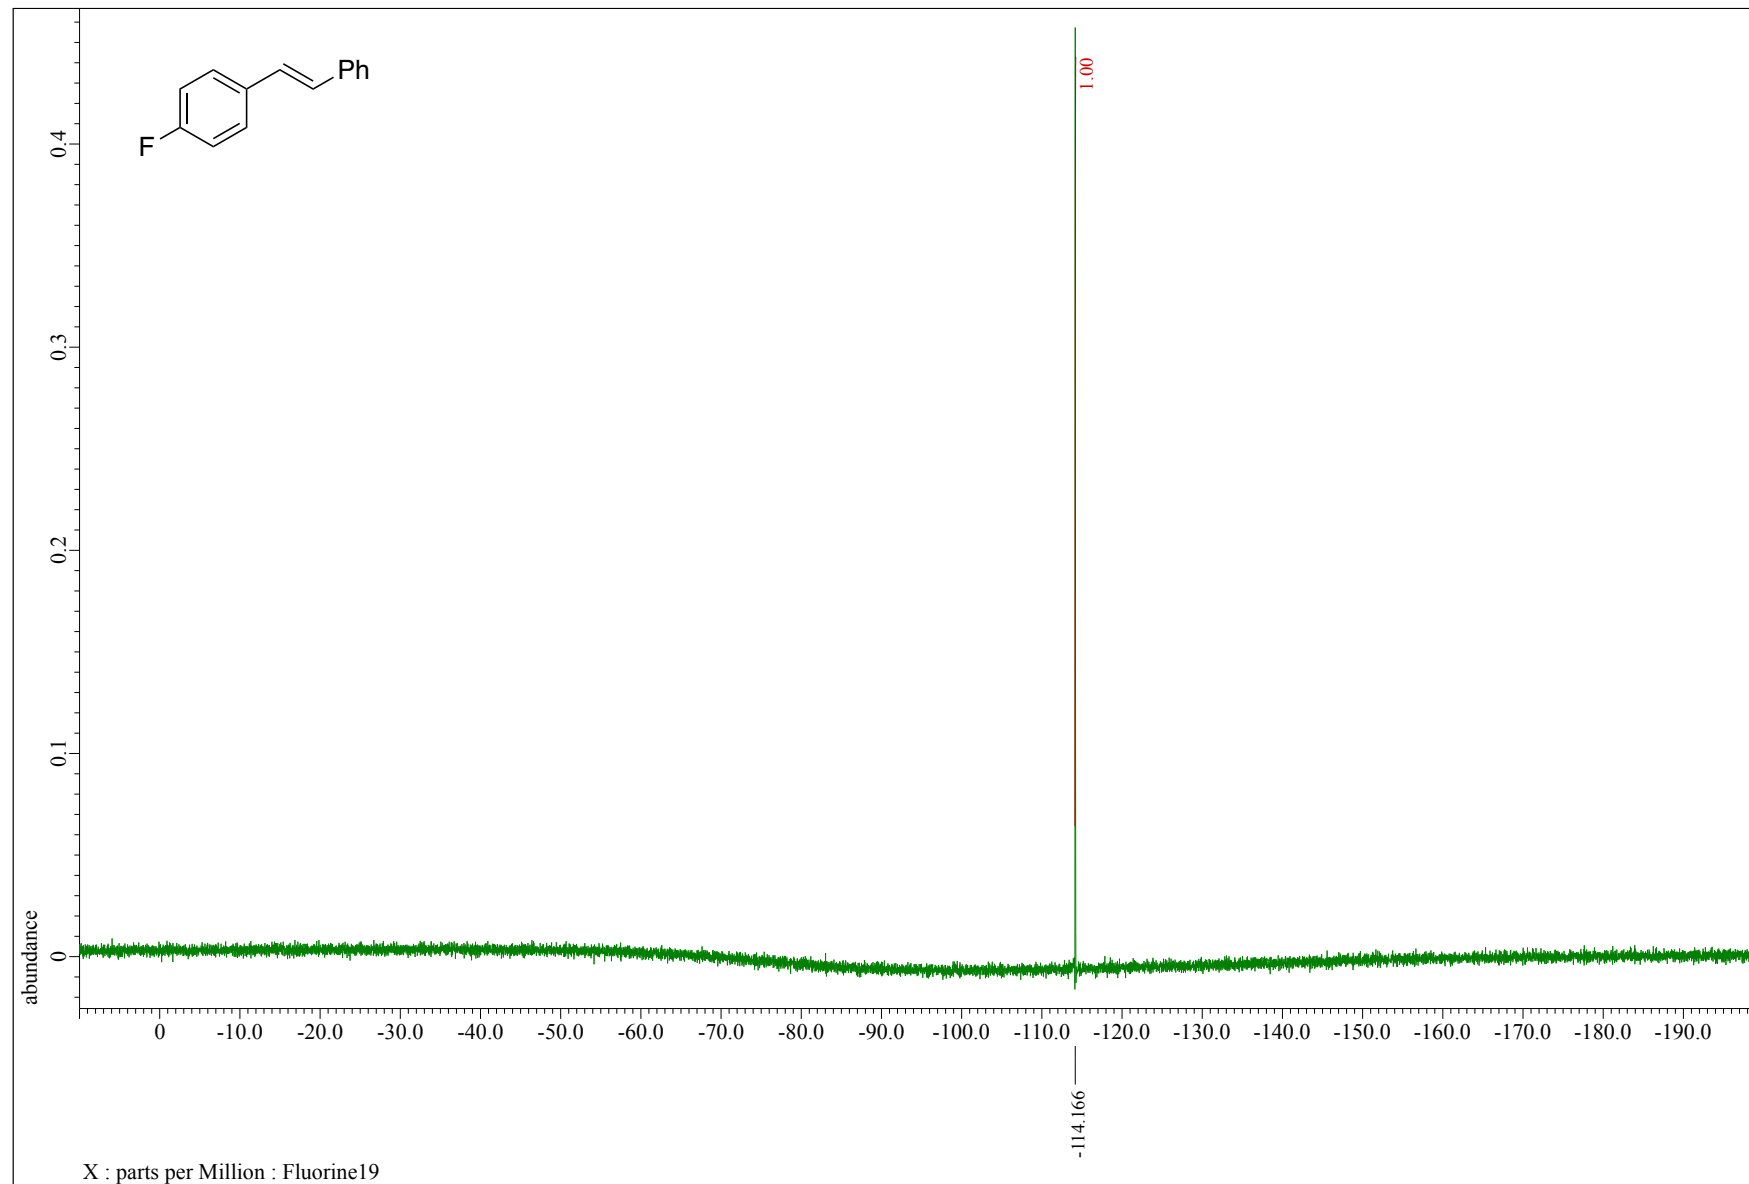

(4h)  $^1\text{H}$  NMR, 400 MHz,  $\text{CDCl}_3$

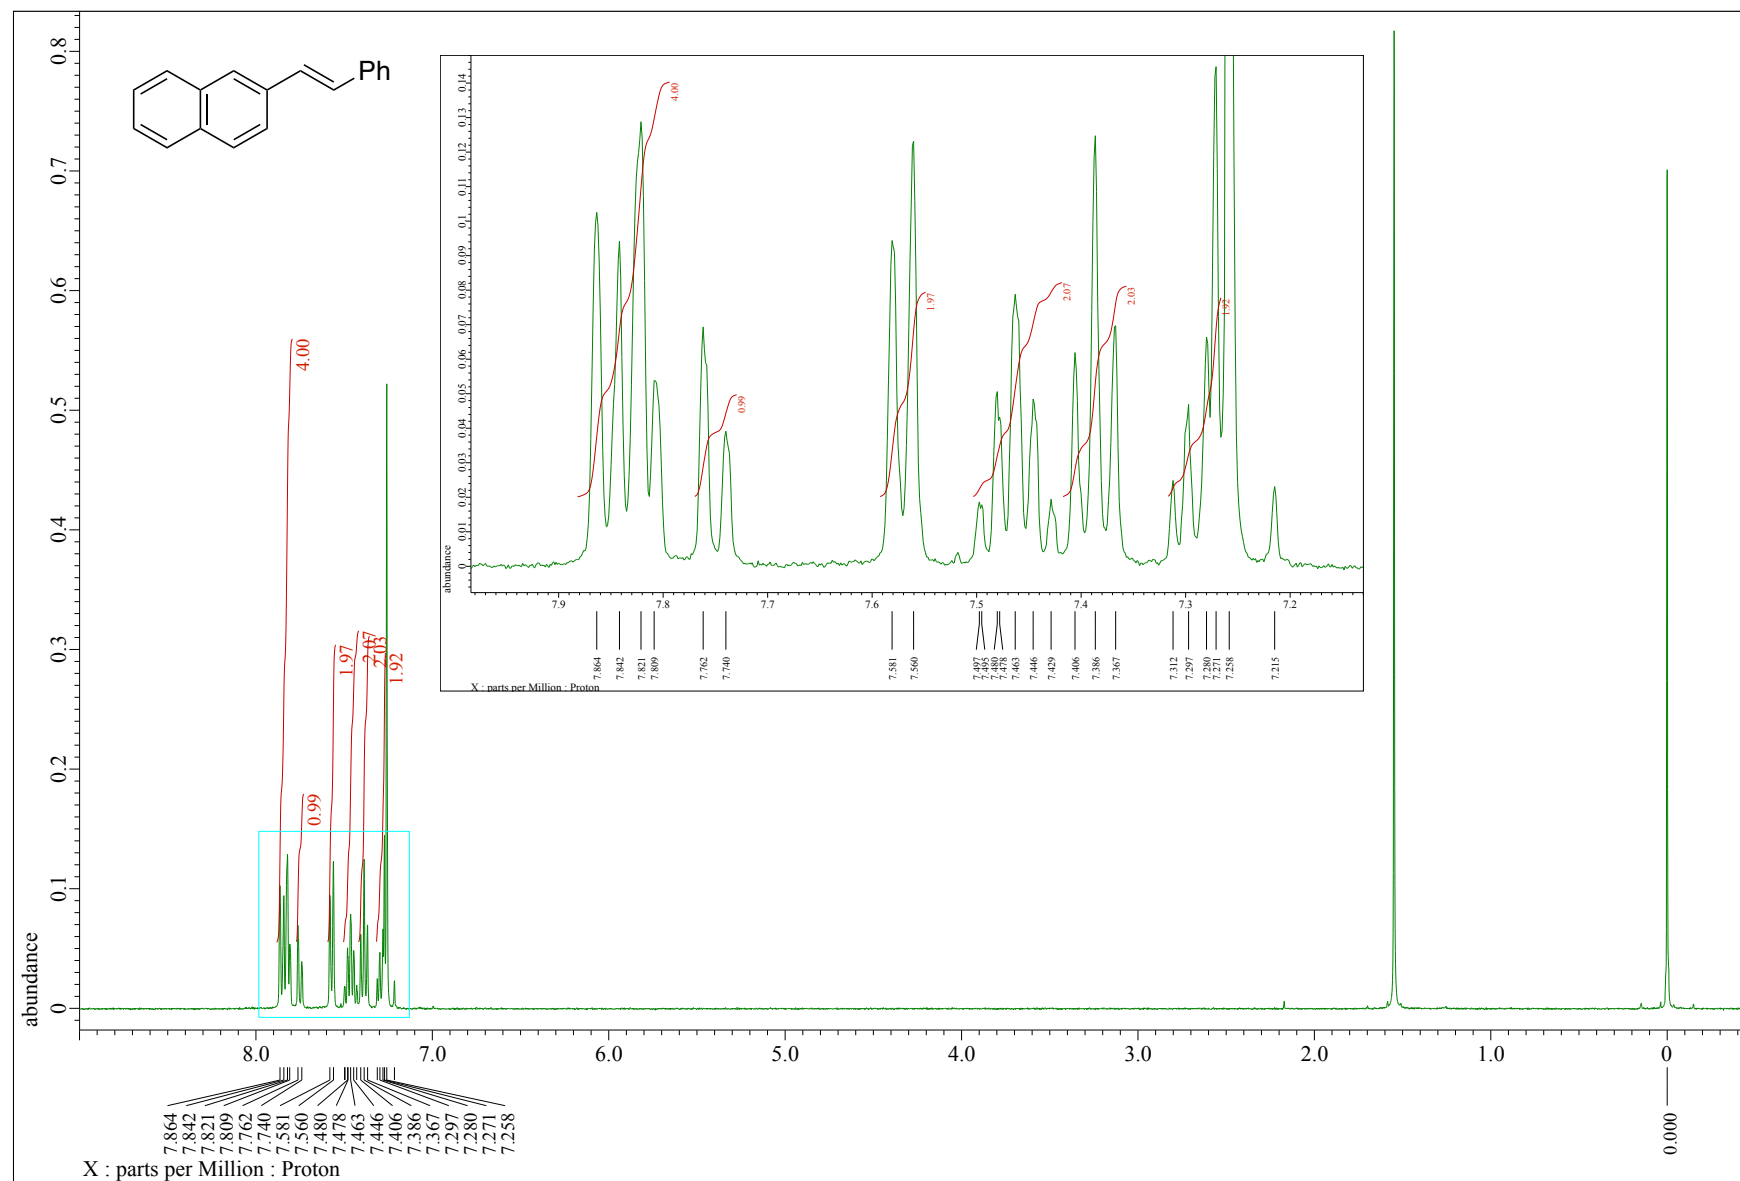

(4i)  $^1\text{H}$  NMR, 400 MHz,  $\text{CDCl}_3$

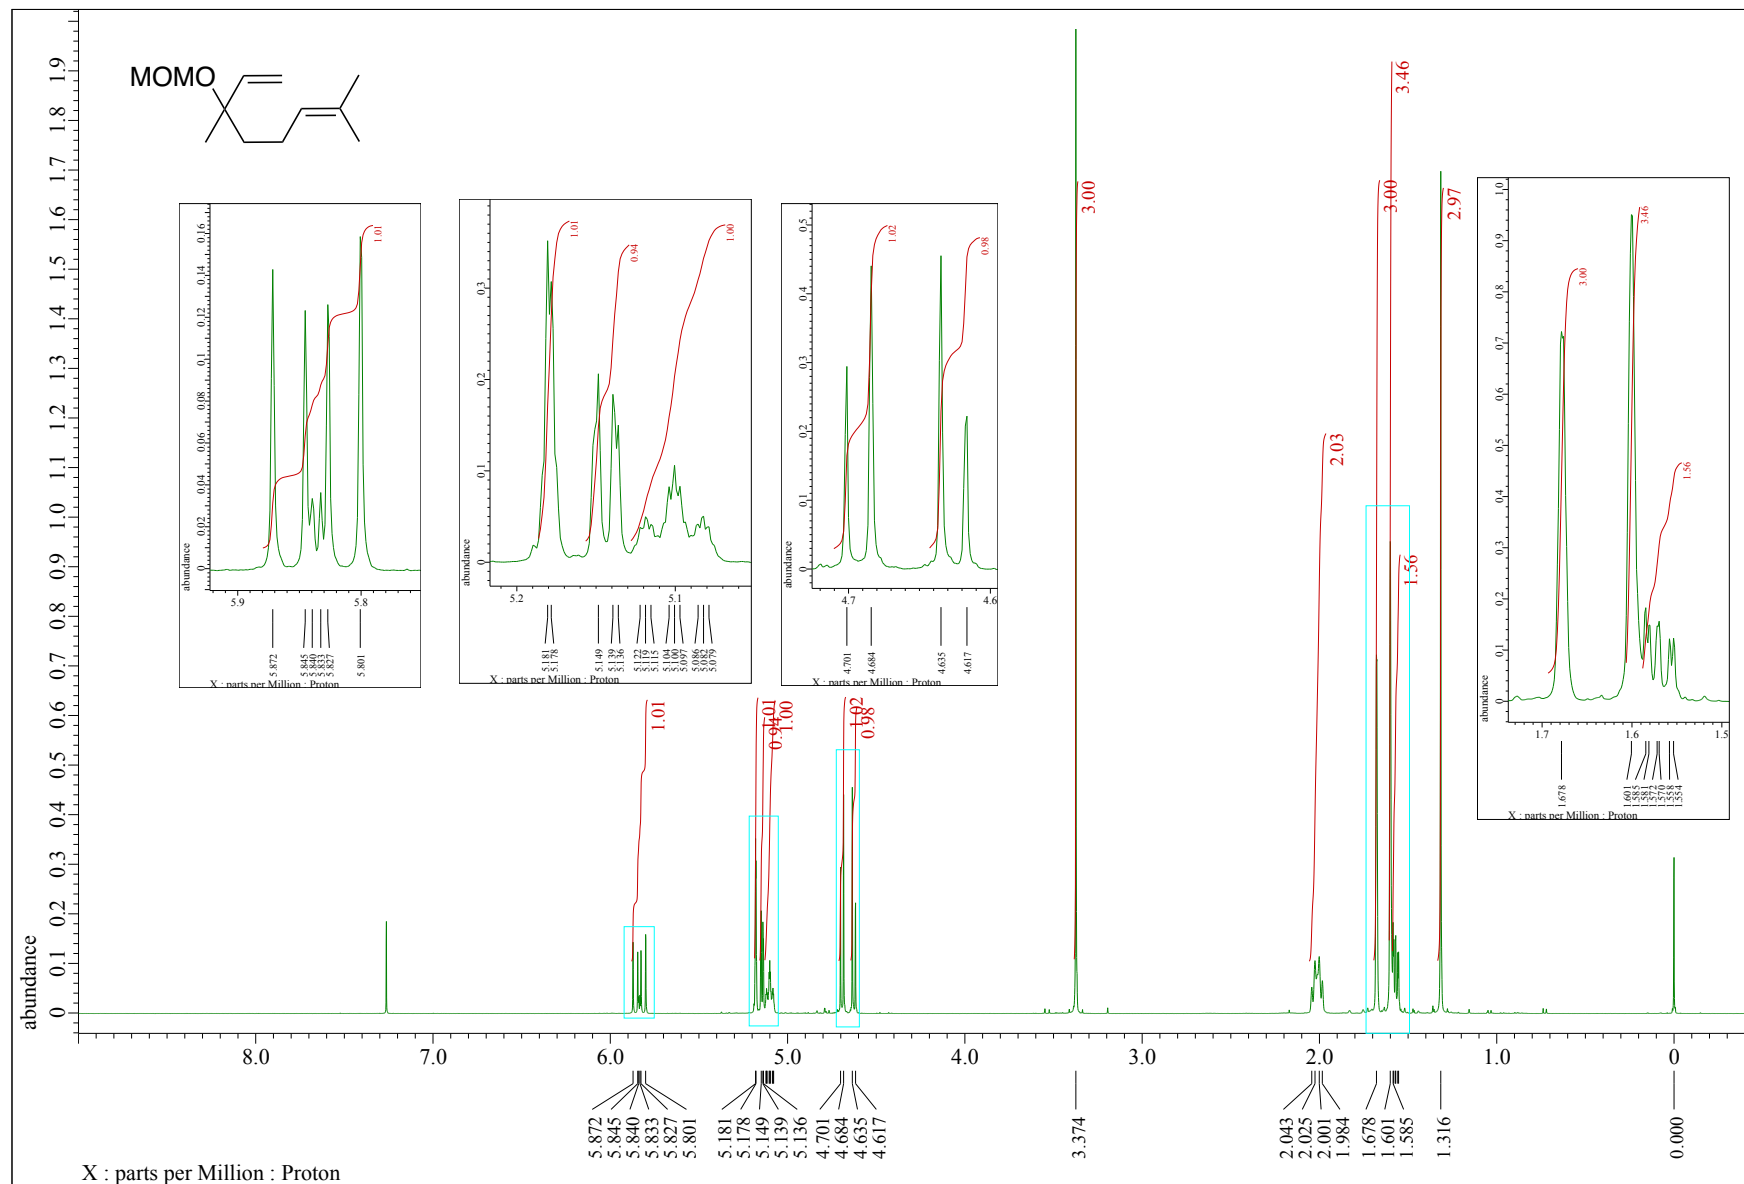

(4i)  $^{13}\text{C}$  NMR, 101 MHz,  $\text{CDCl}_3$

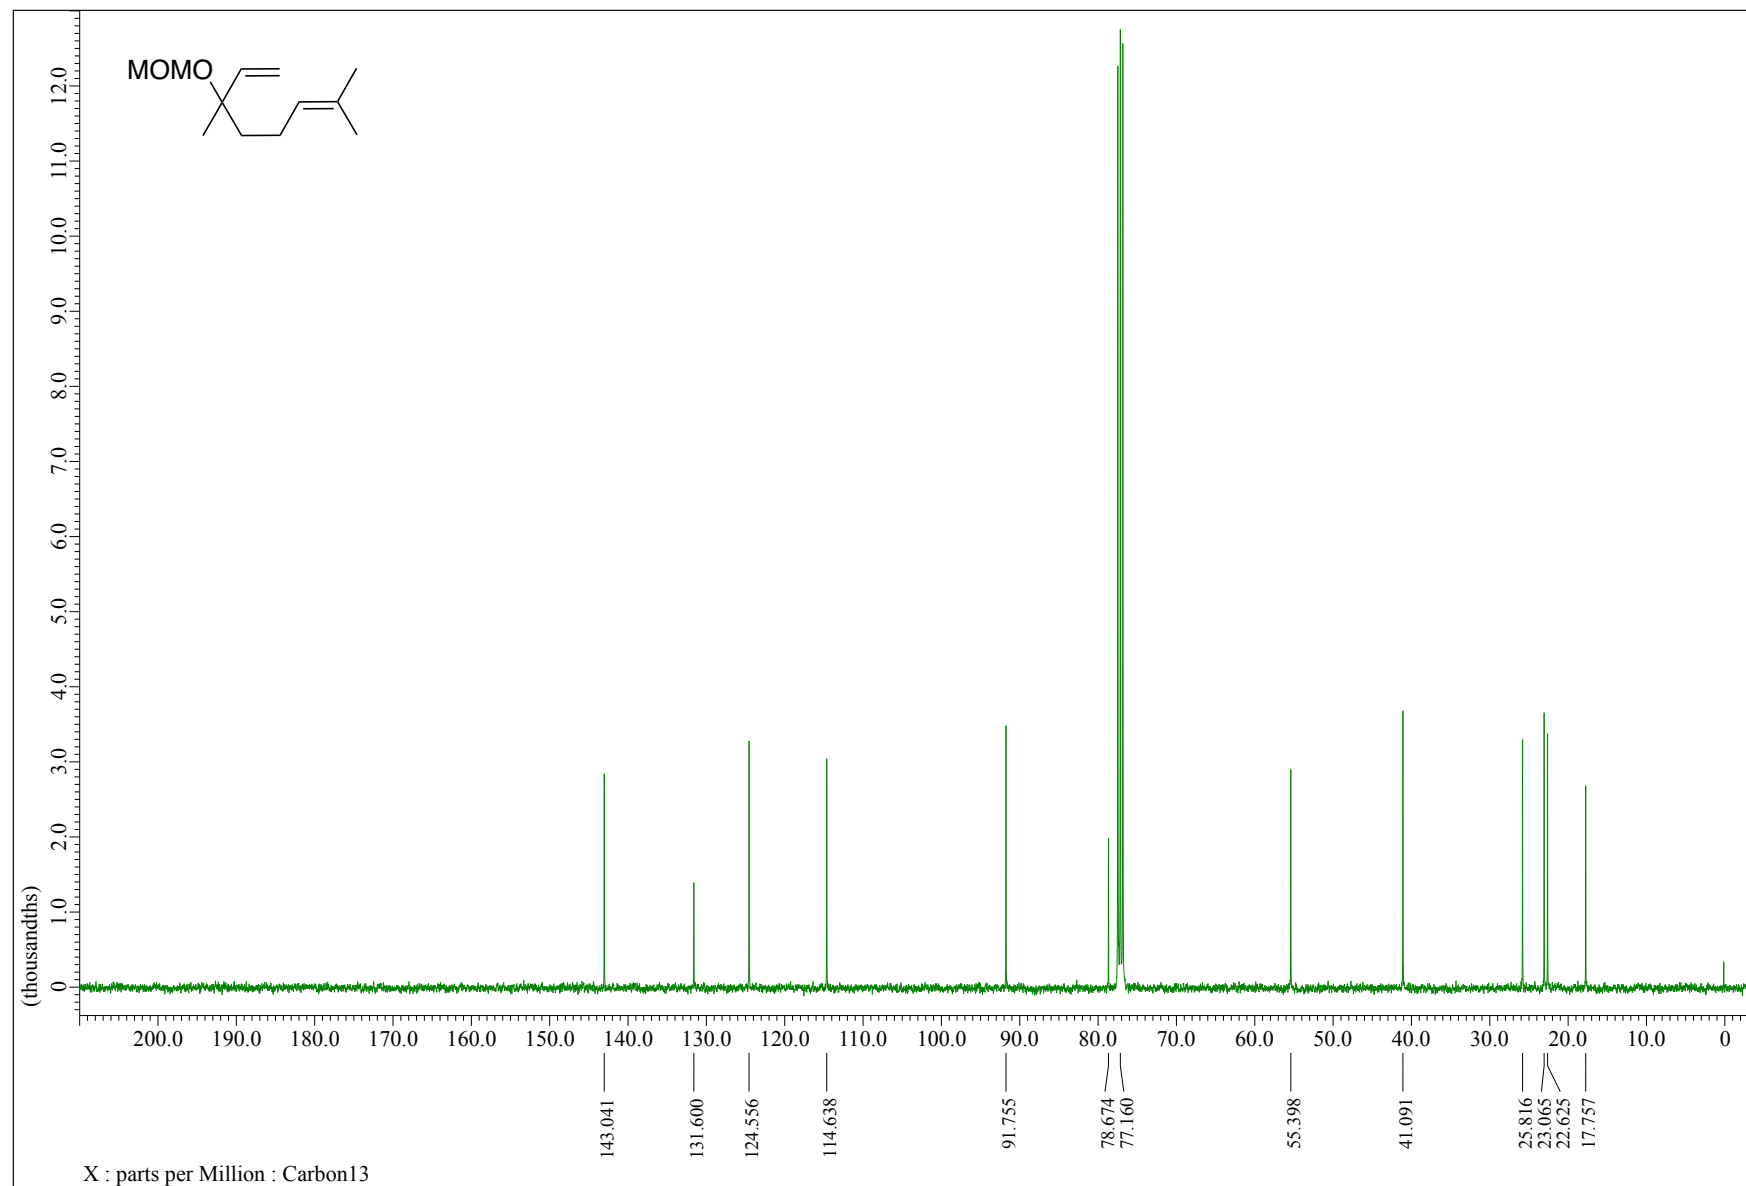

(5b)  $^1\text{H}$  NMR, 400 MHz,  $\text{CDCl}_3$

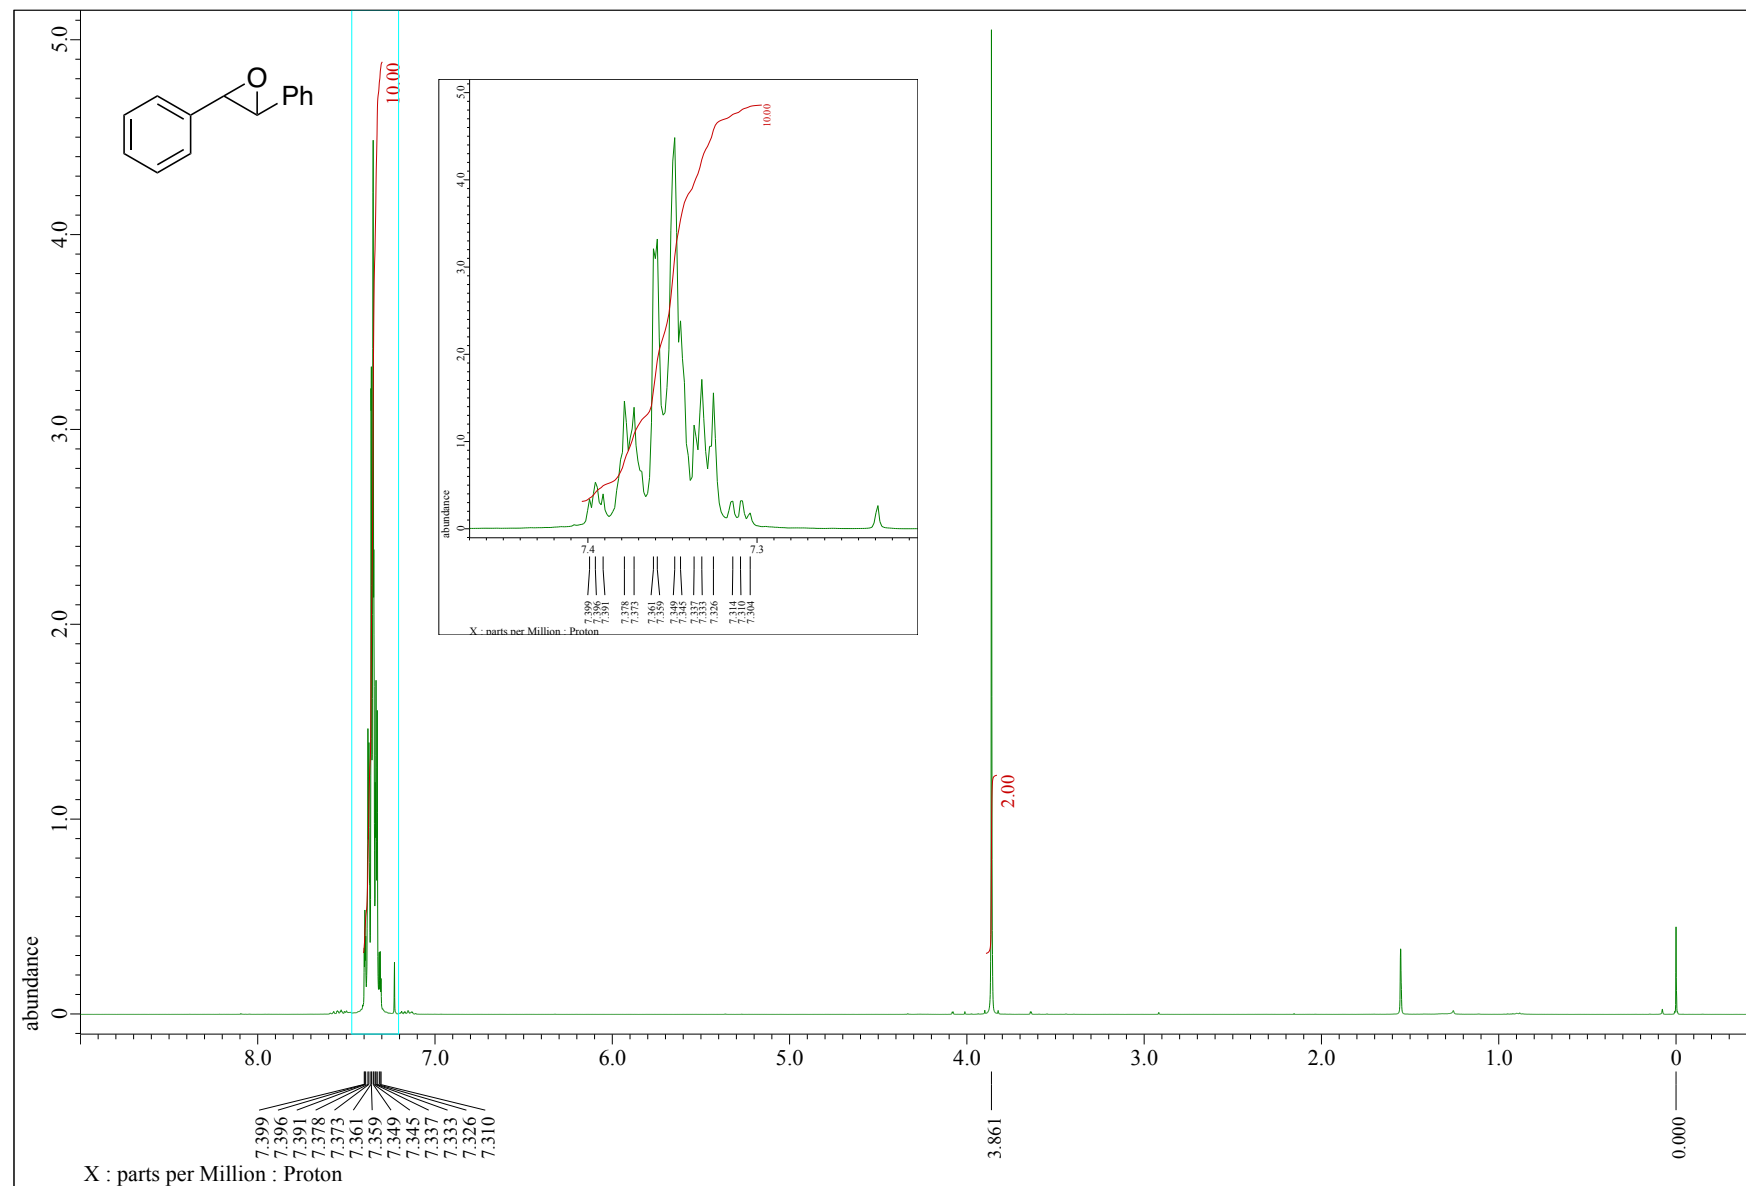

(5c)  $^1\text{H}$  NMR, 400 MHz,  $\text{CDCl}_3$

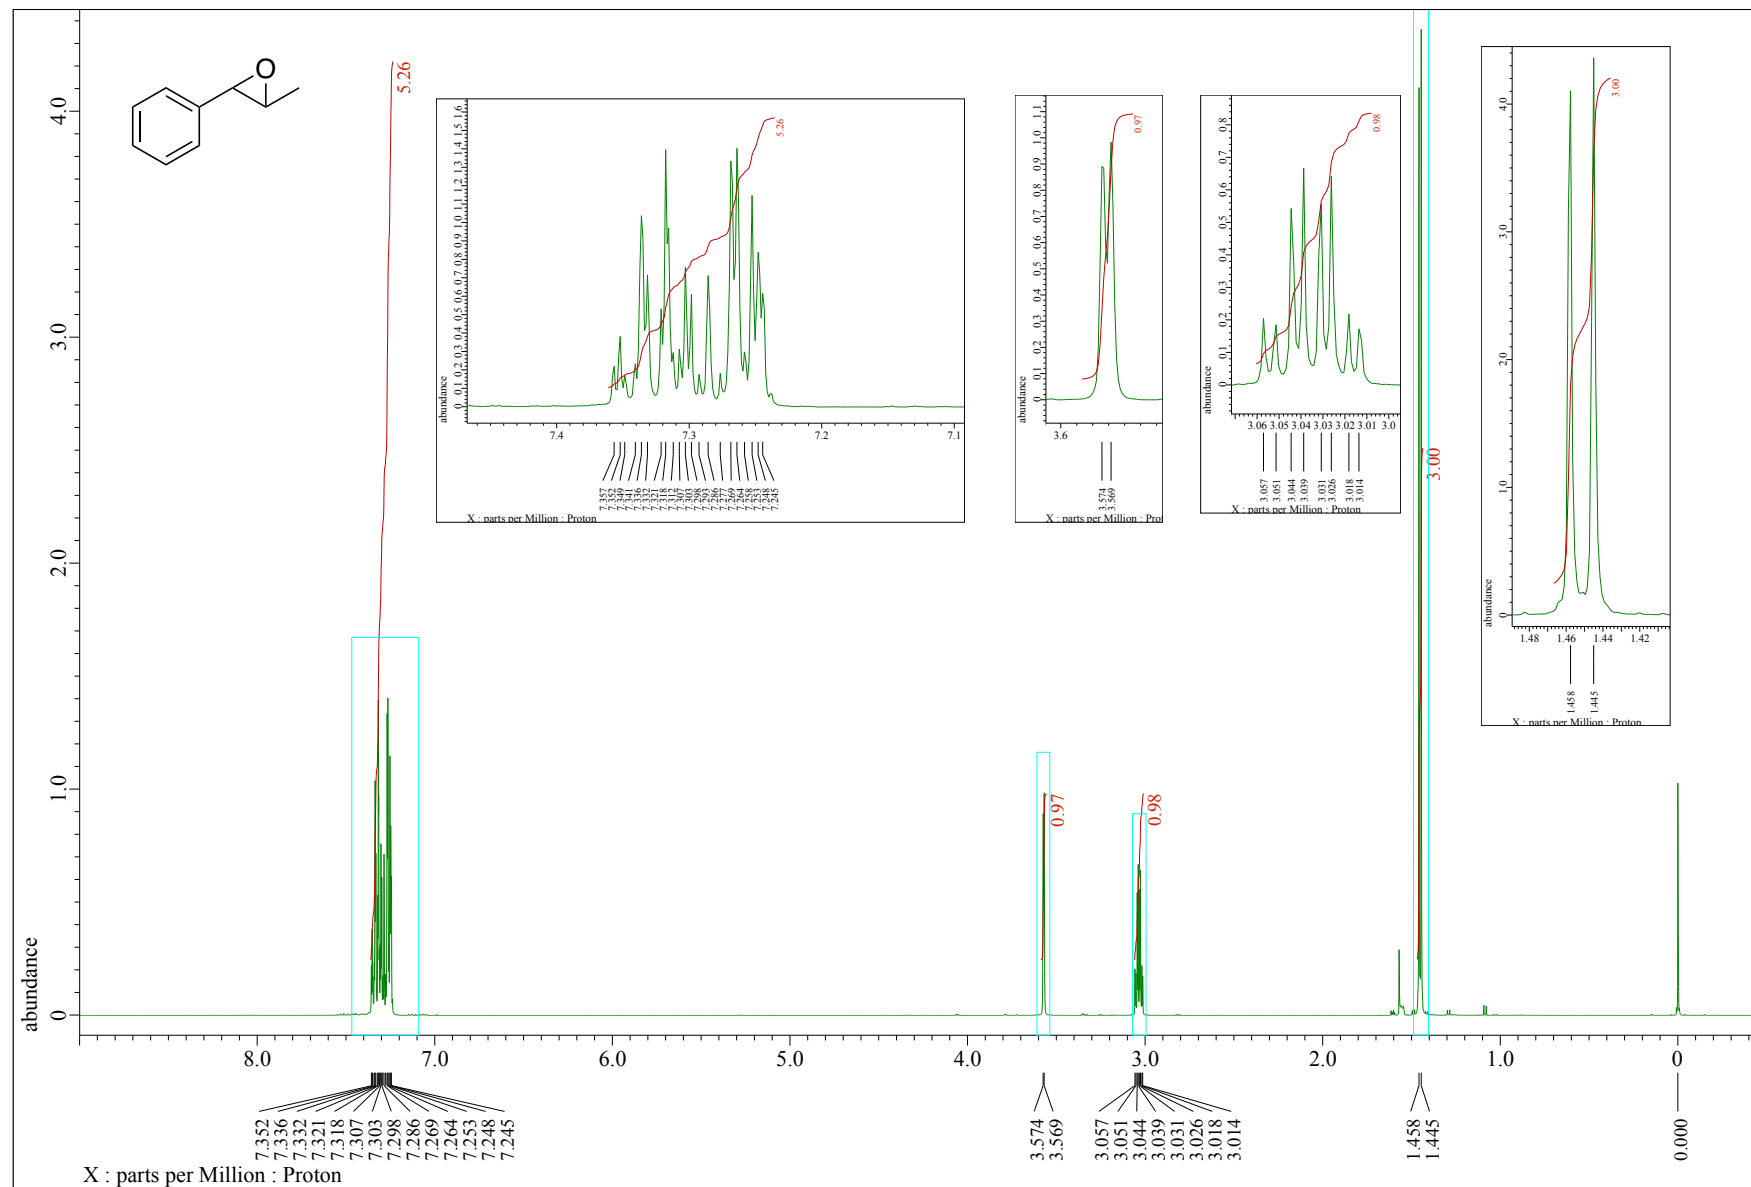



(5d)  $^1\text{H}$  NMR, 400 MHz,  $\text{CDCl}_3$

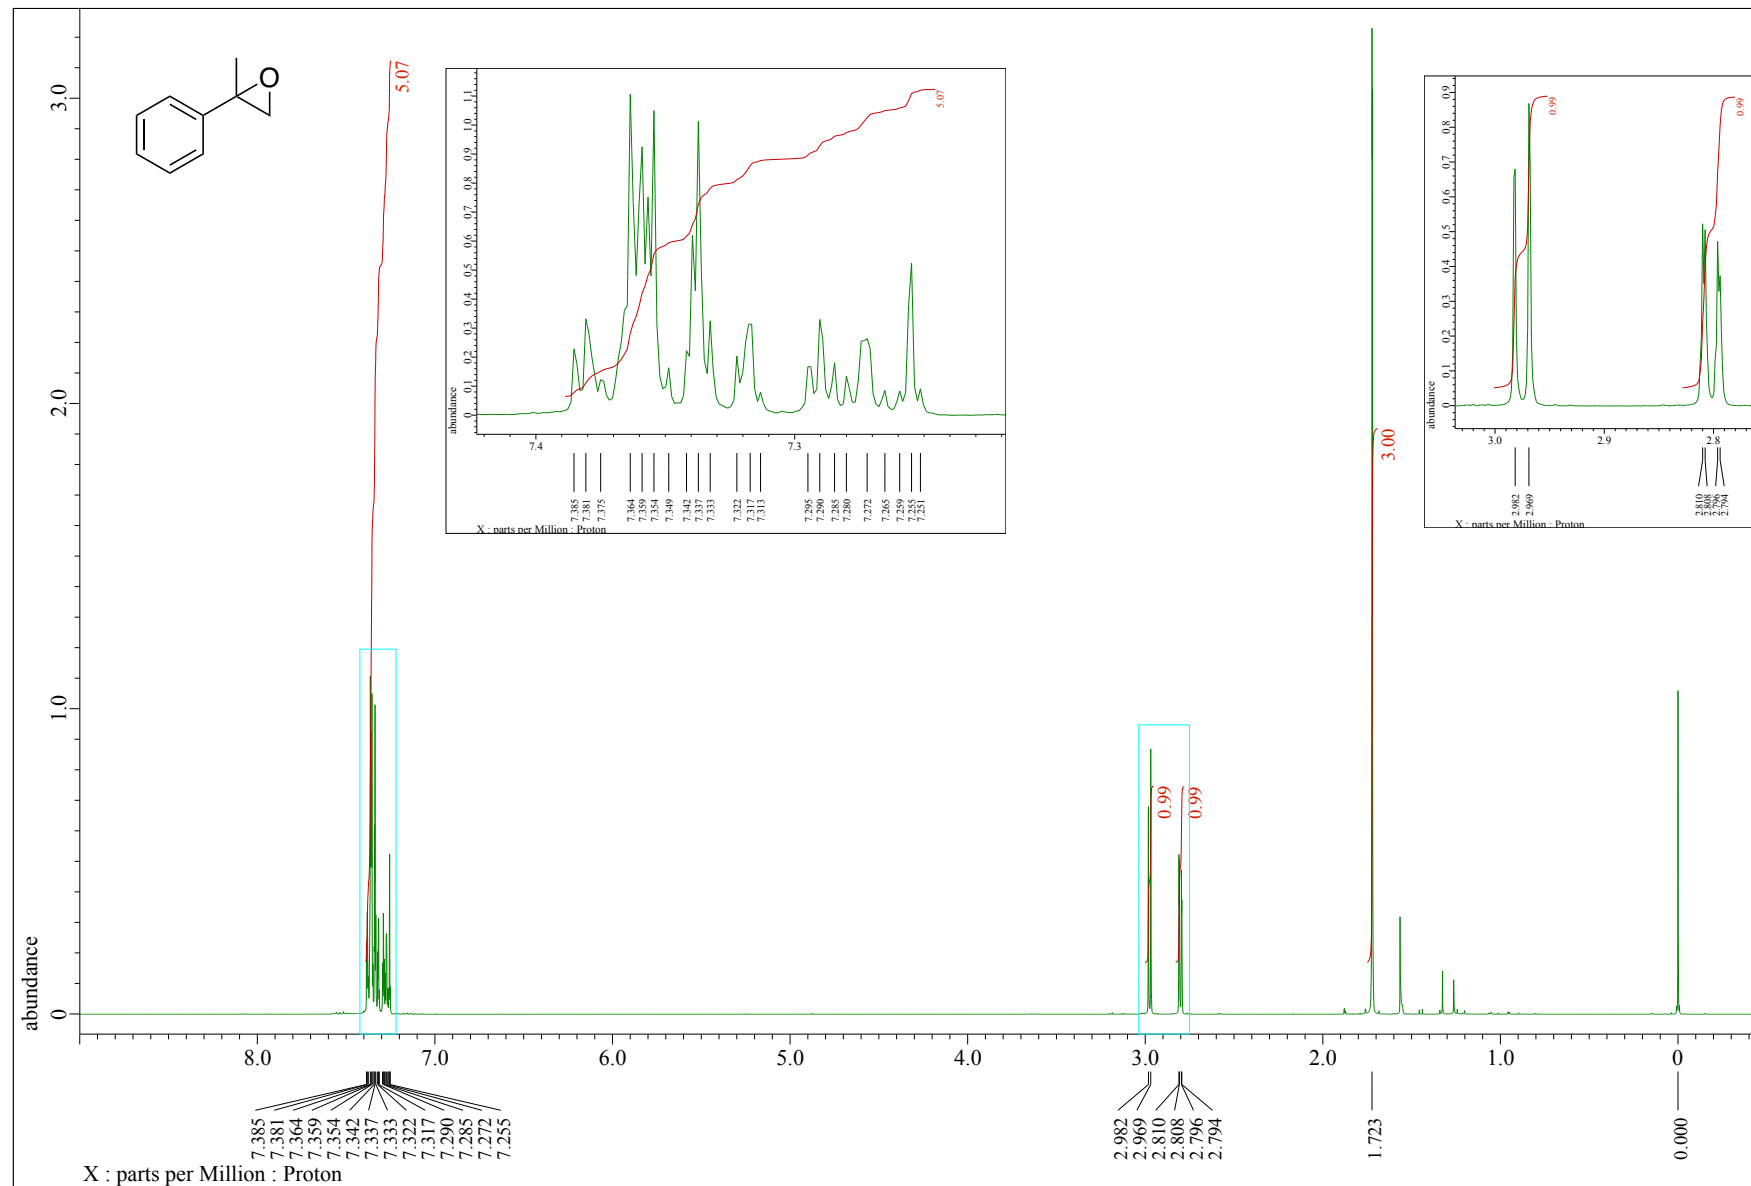

(5e)  $^1\text{H}$  NMR, 400 MHz,  $\text{CDCl}_3$

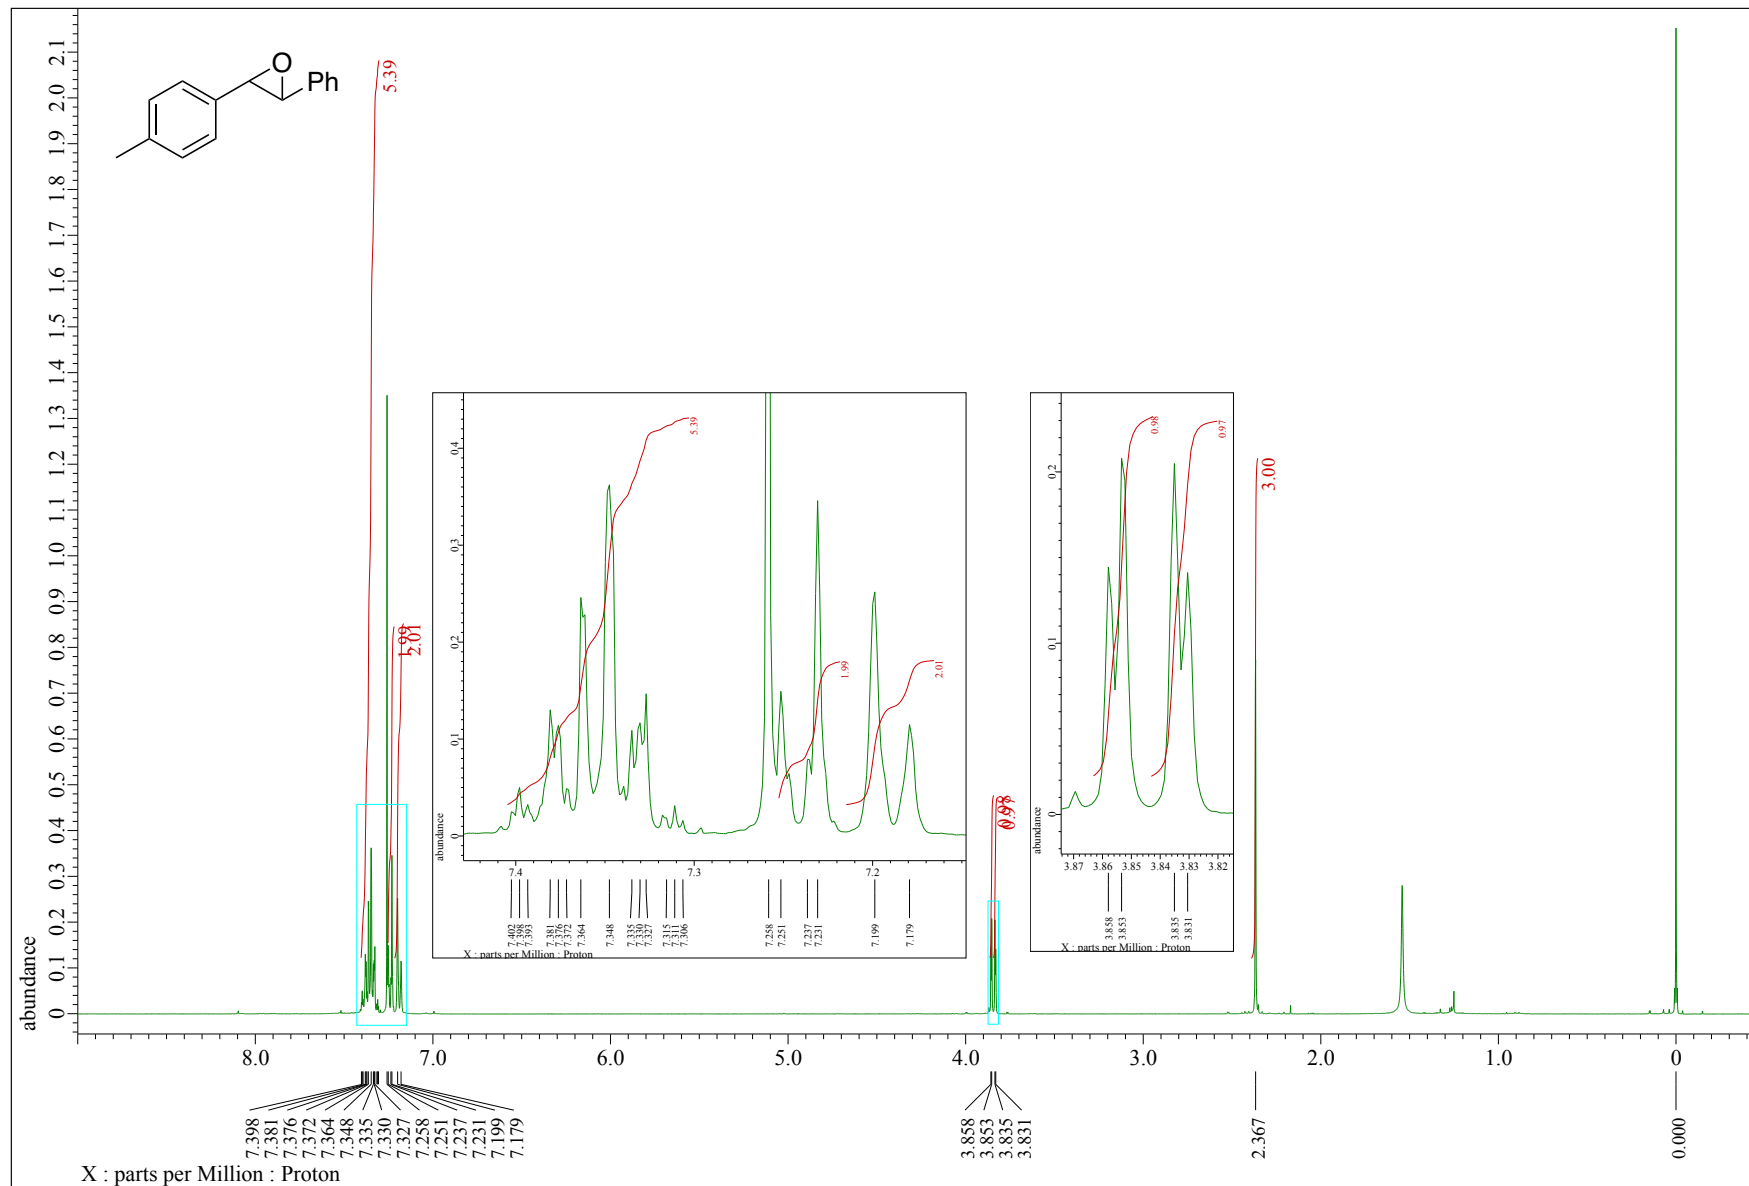

(5f)  $^1\text{H}$  NMR, 400 MHz,  $\text{CDCl}_3$

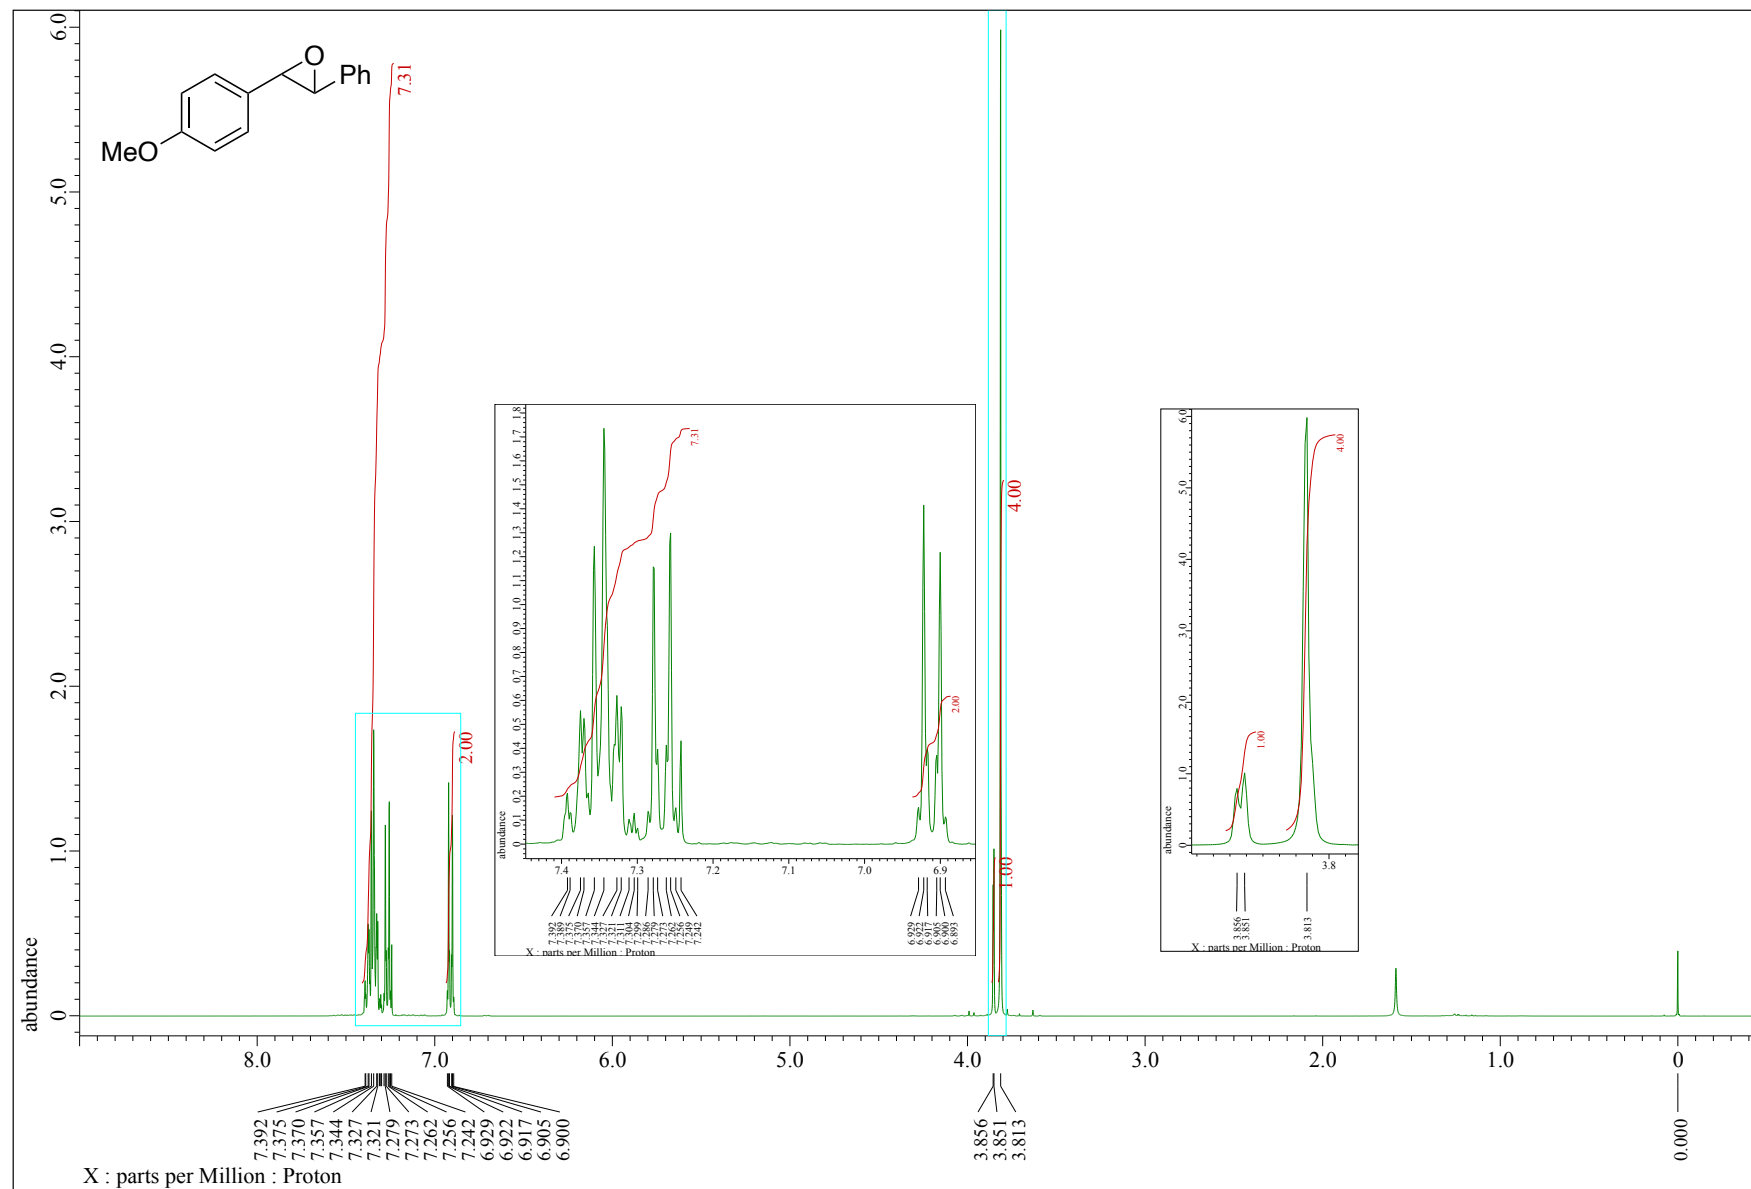

(5g)  $^1\text{H}$  NMR, 400 MHz,  $\text{CDCl}_3$

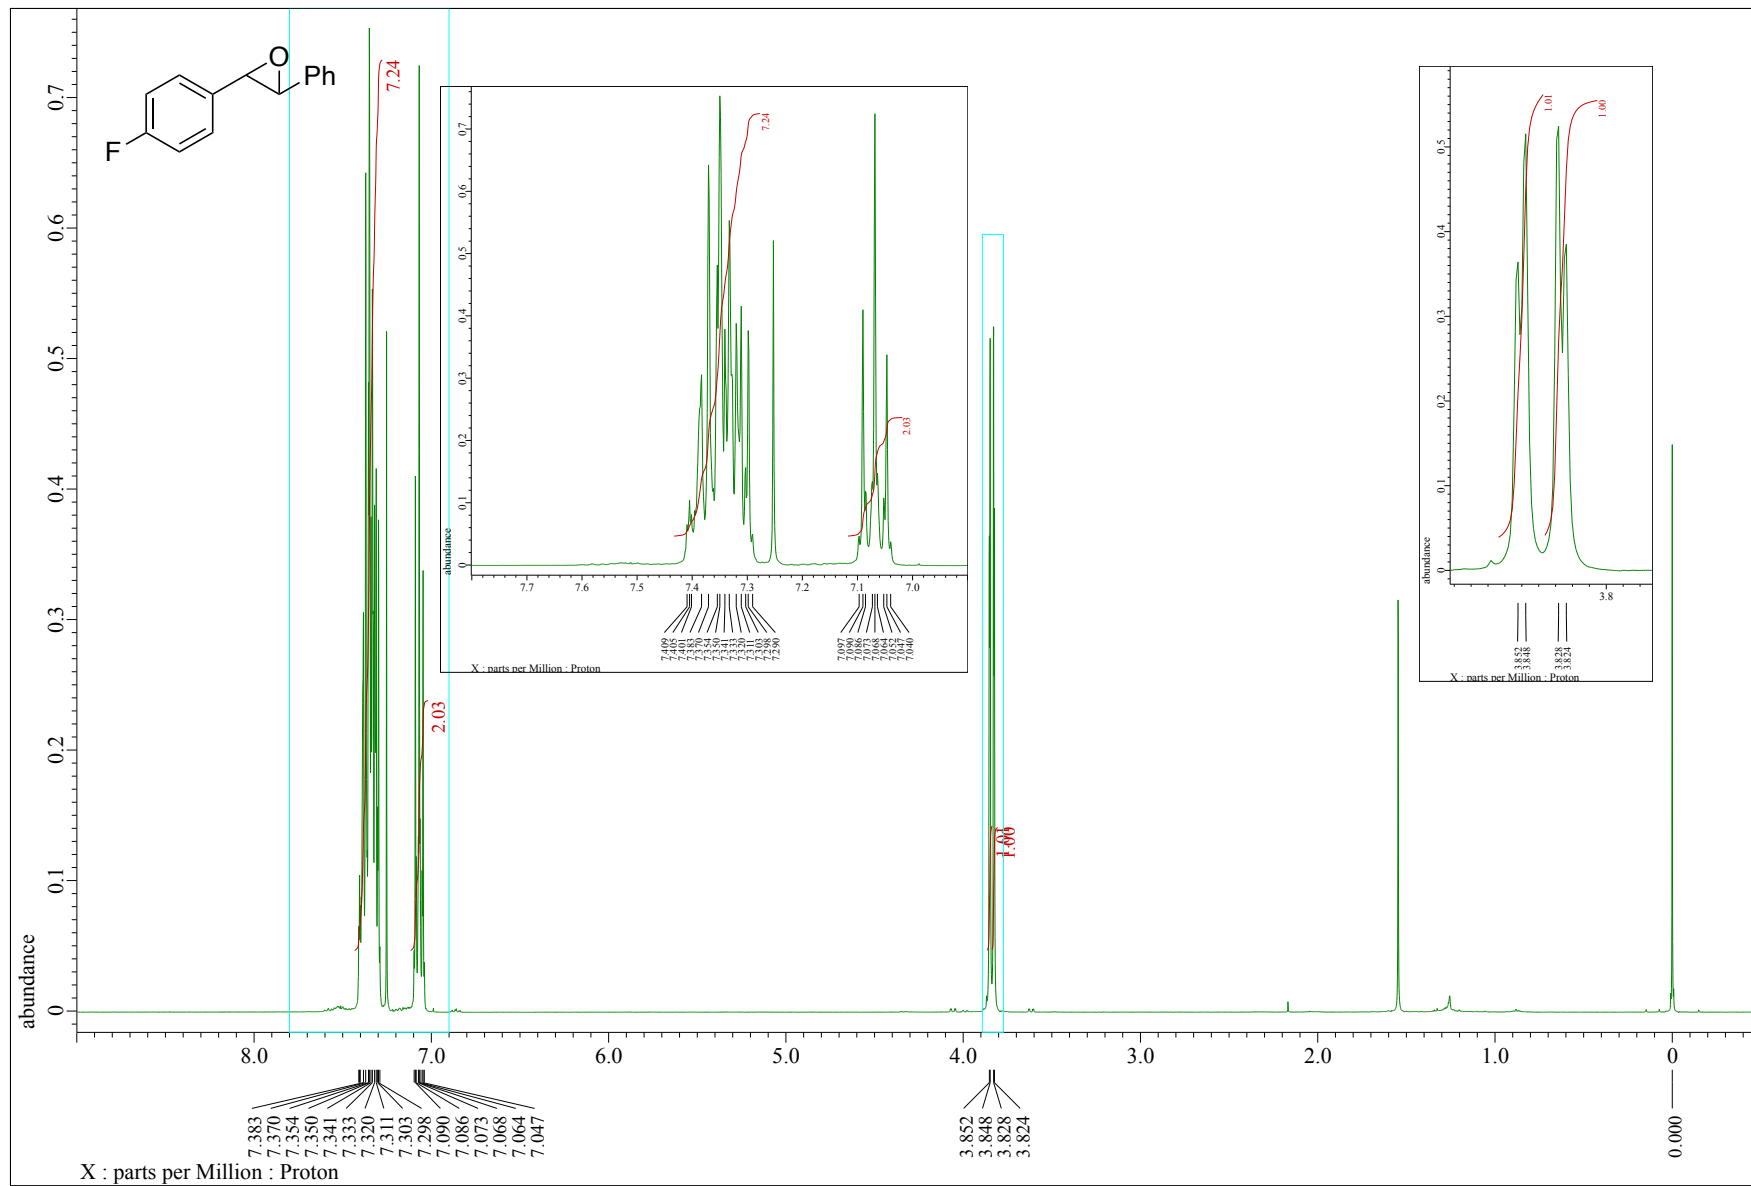

(5g)  $^{19}\text{F}$  NMR, 376 MHz,  $\text{CDCl}_3$

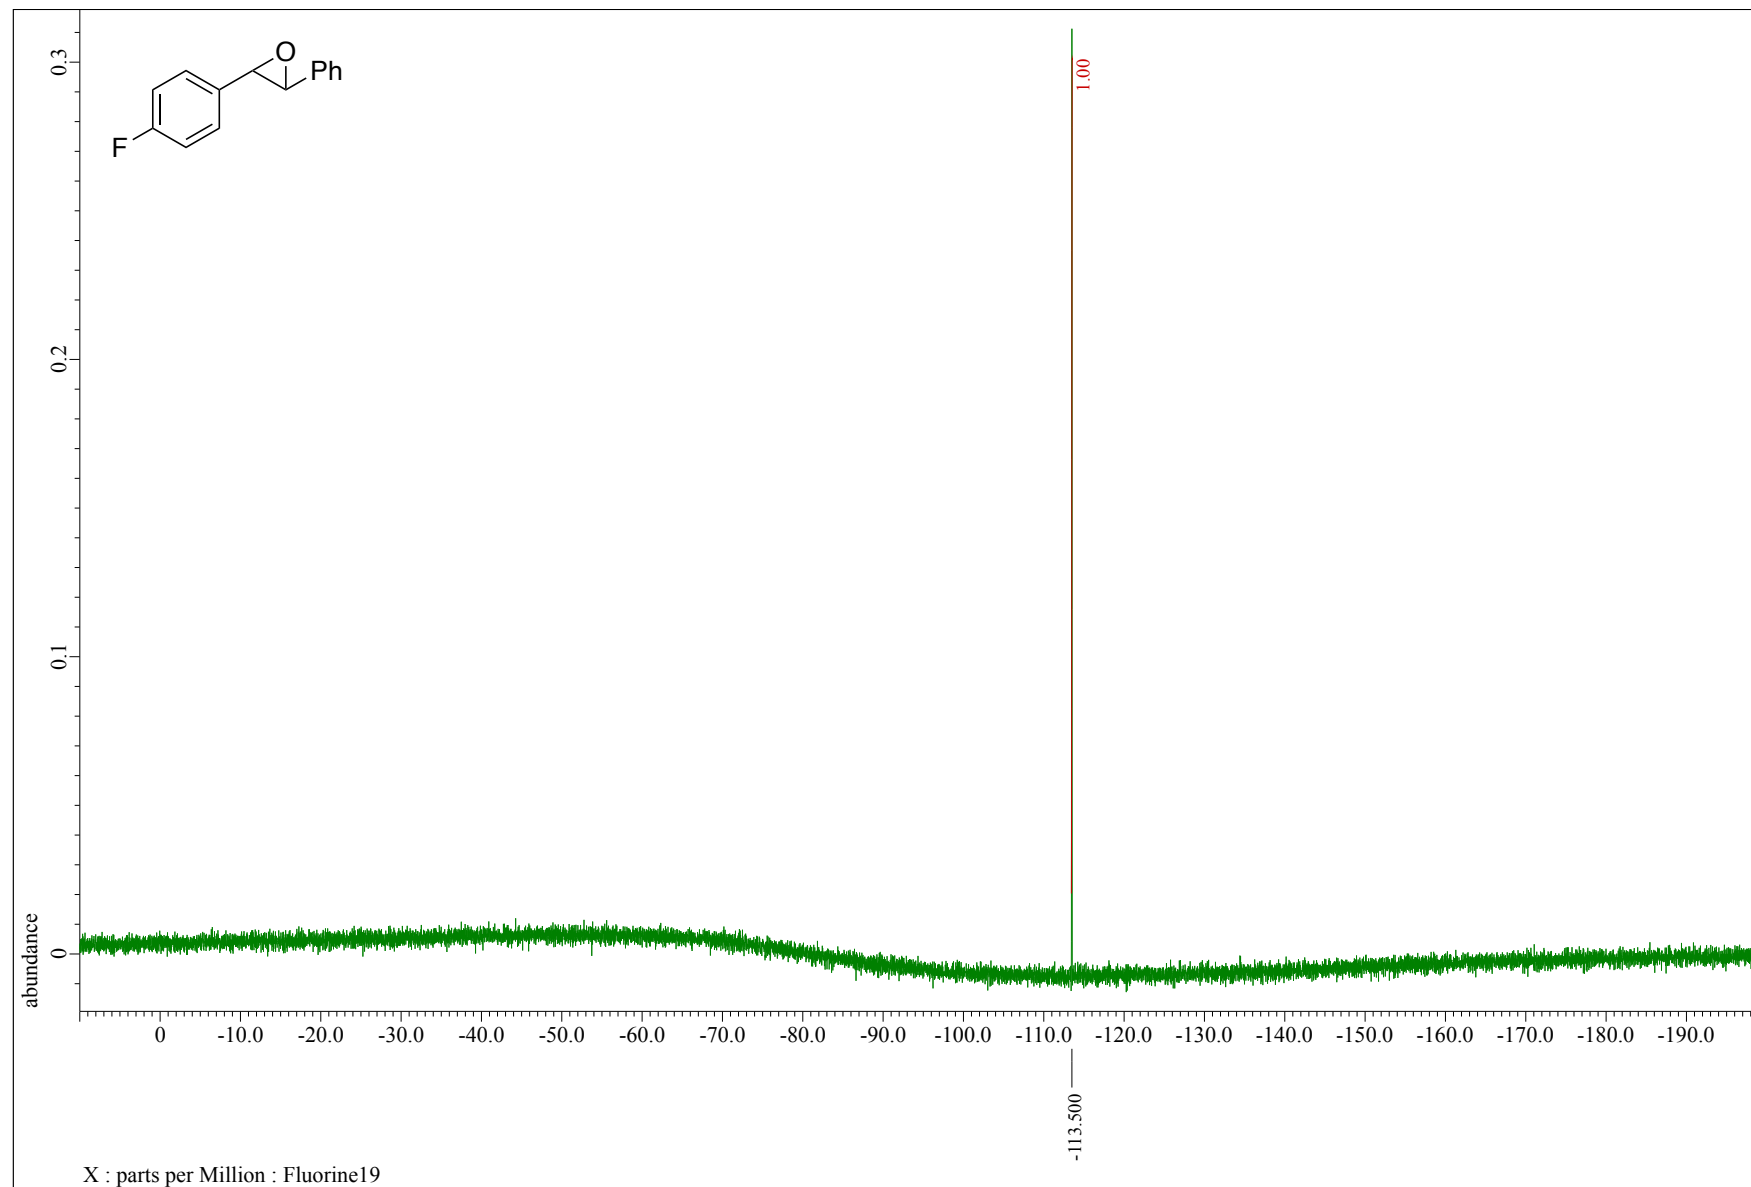

(5h)  $^1\text{H}$  NMR, 400 MHz,  $\text{CDCl}_3$

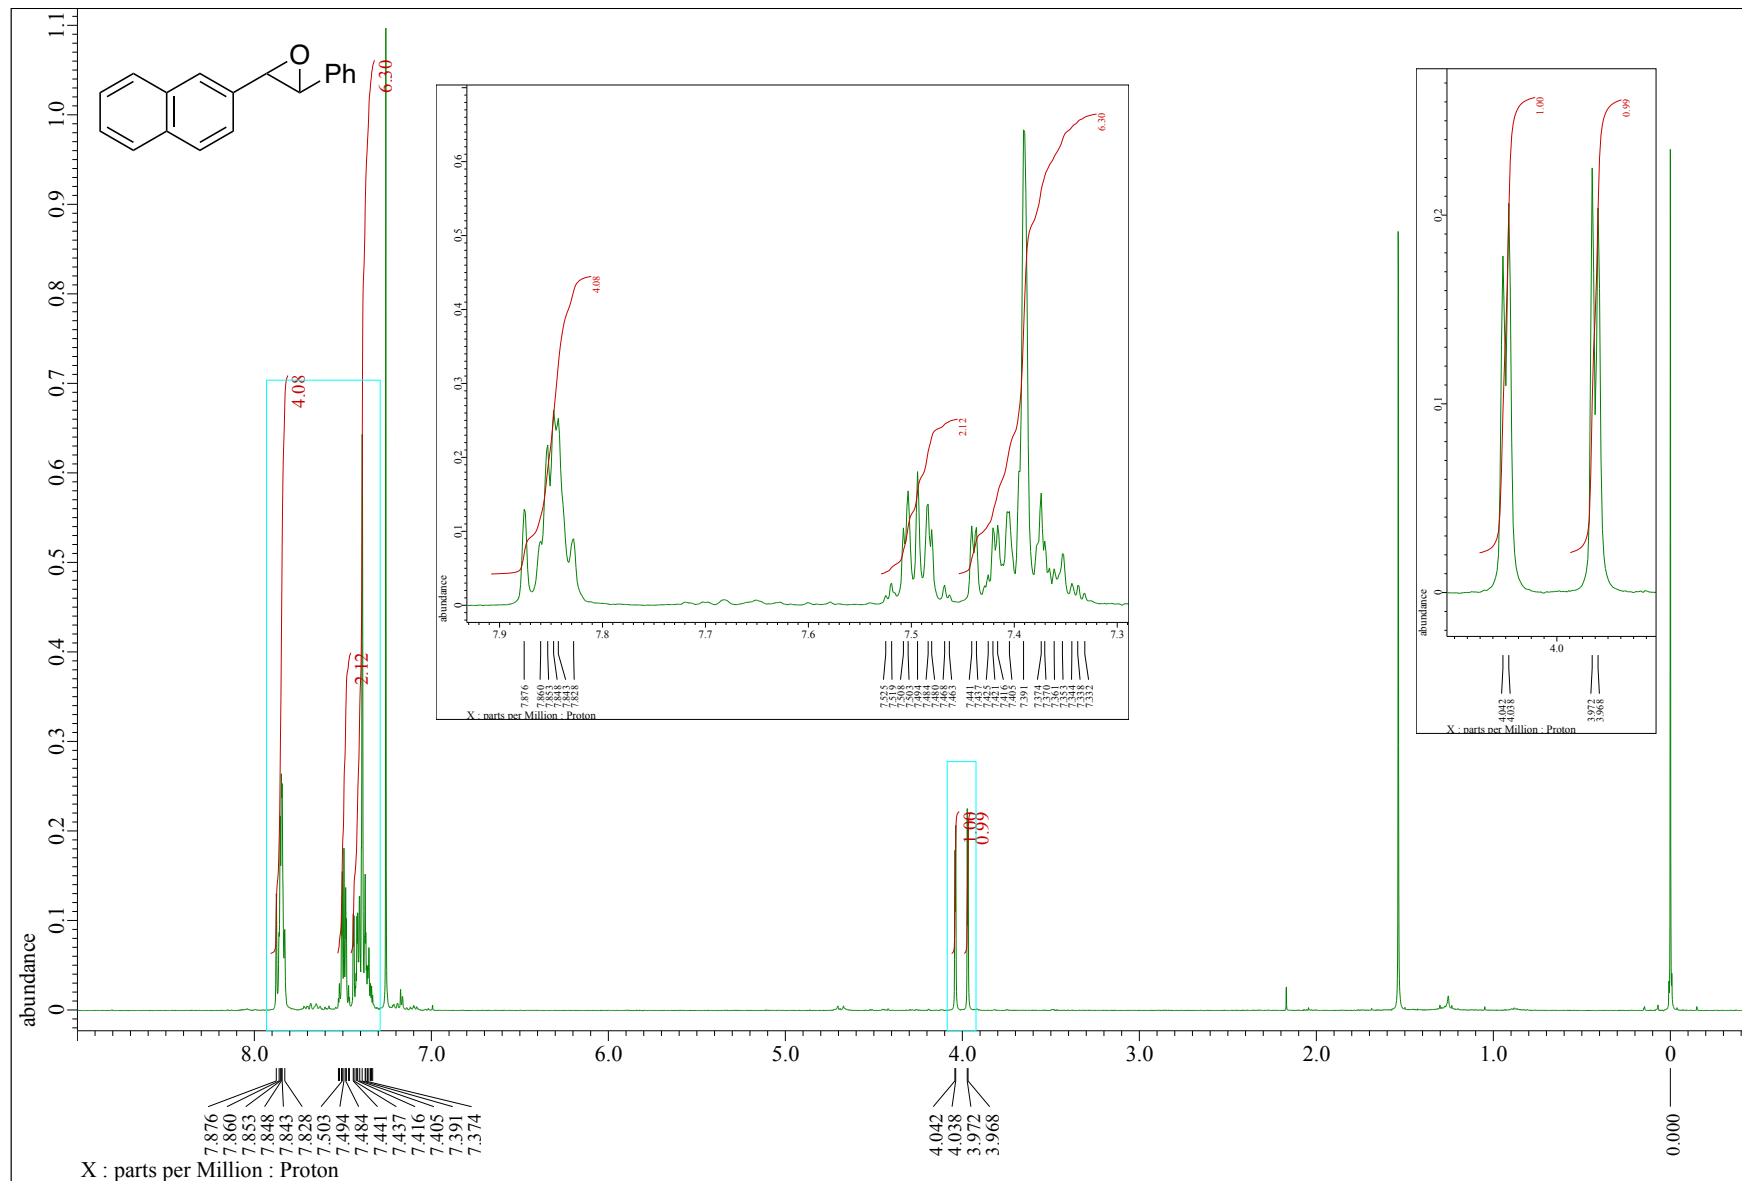

(5i)  $^1\text{H}$  NMR, 400 MHz,  $\text{CDCl}_3$

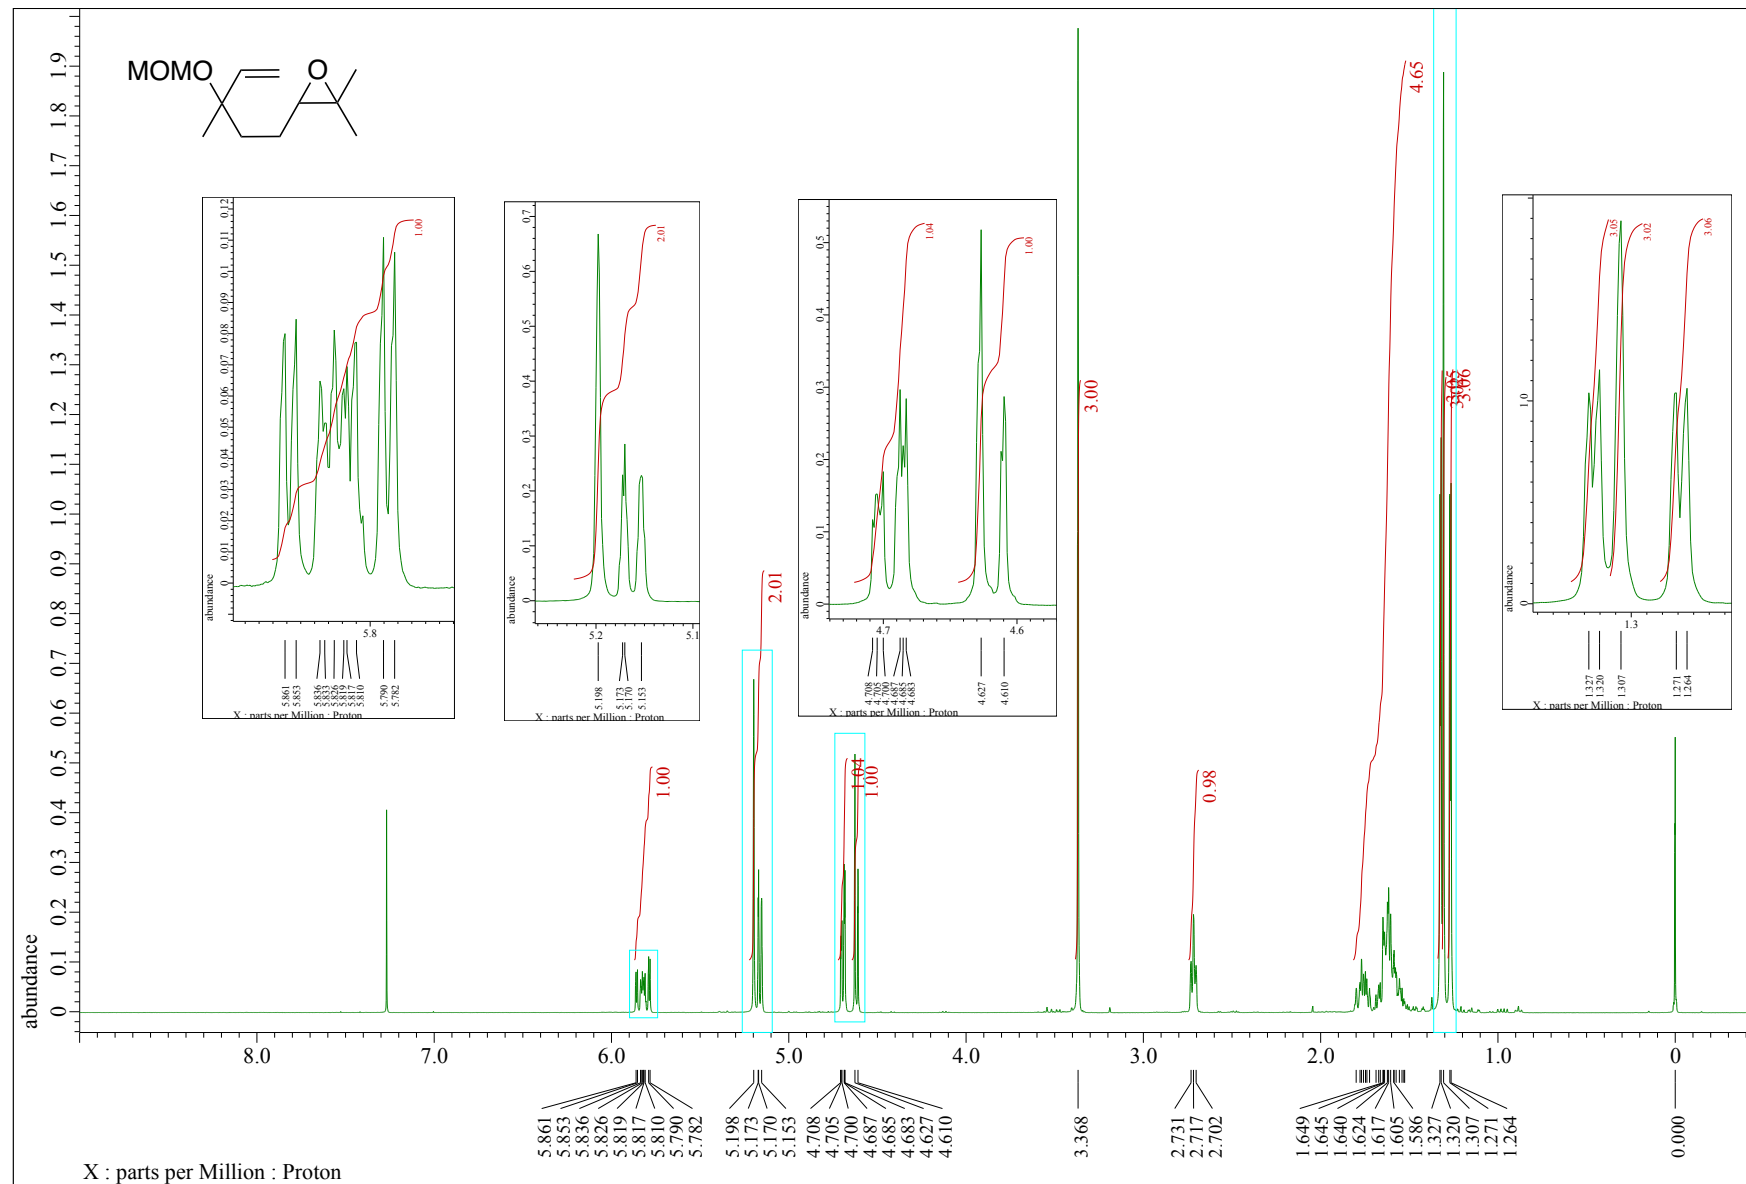

(5i)  $^{13}\text{C}$  NMR, 101 MHz,  $\text{CDCl}_3$

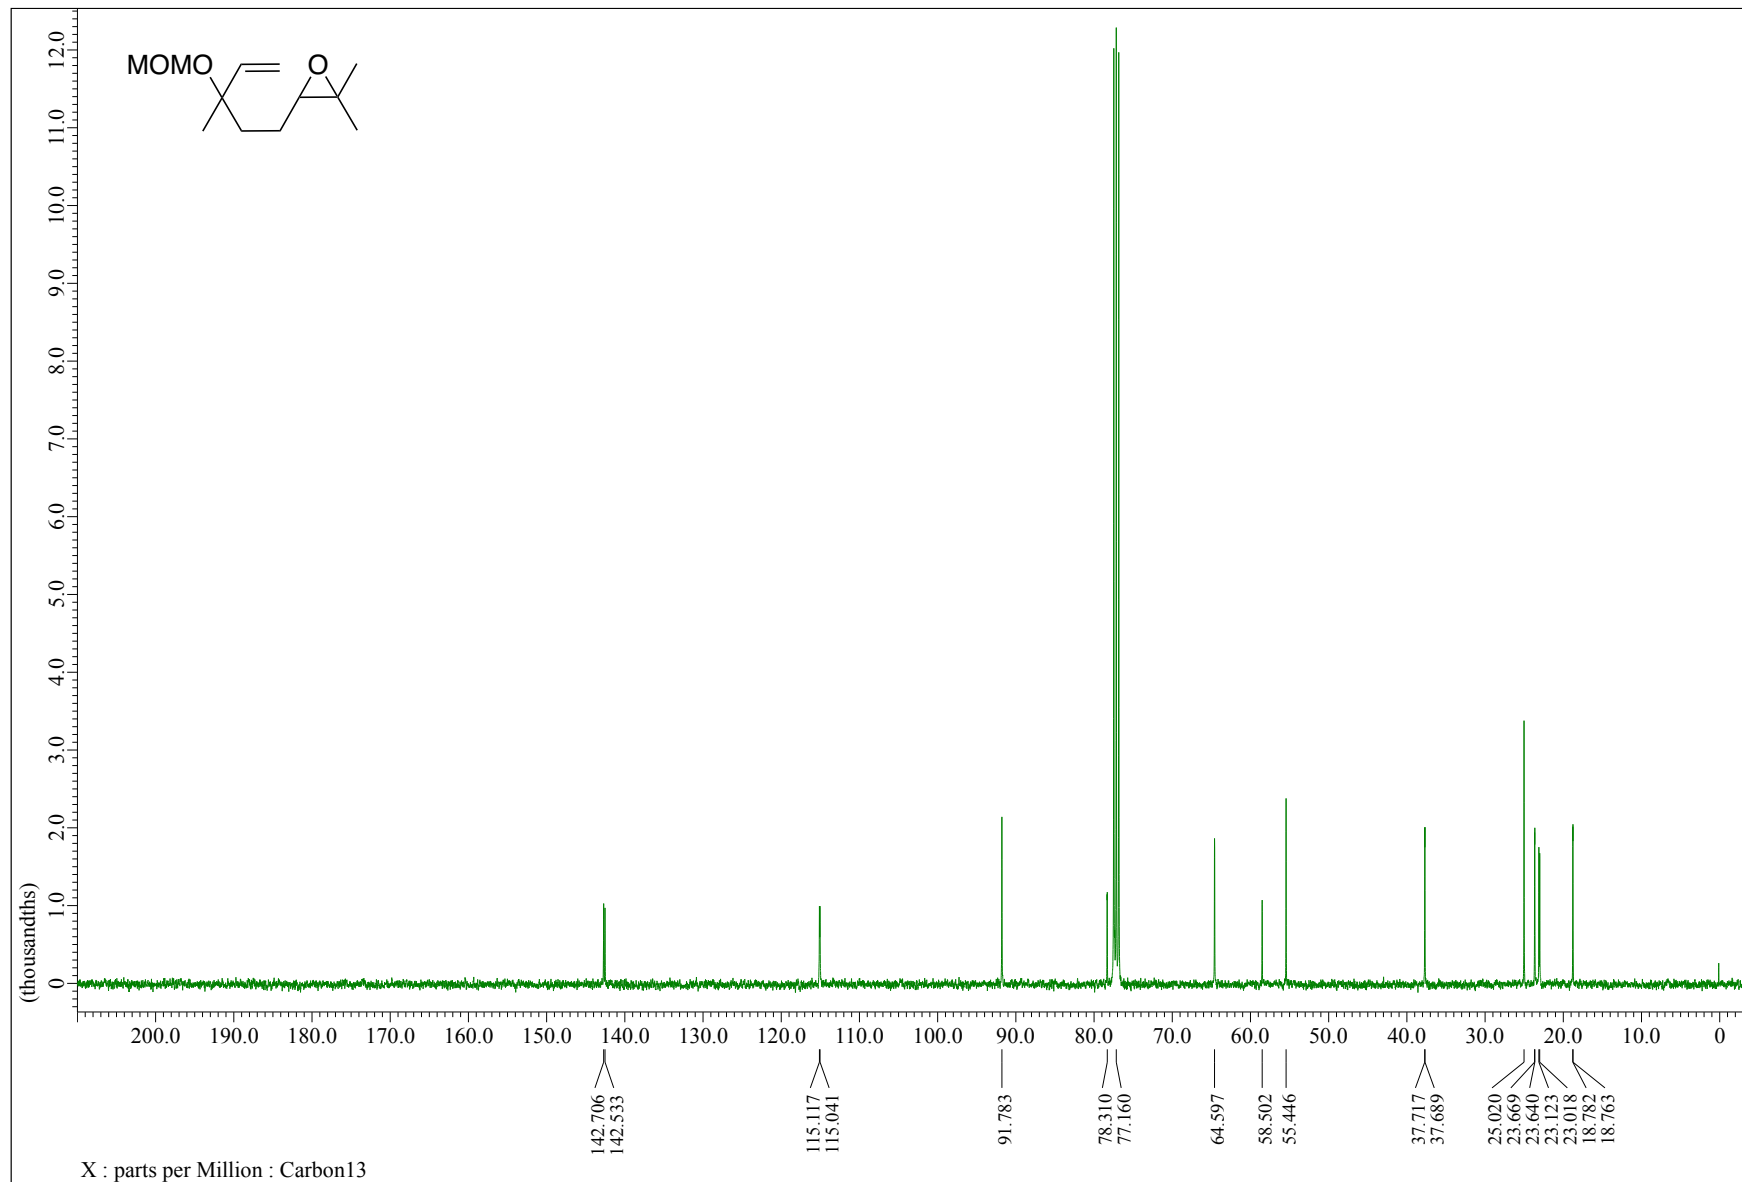

Supplement: s1 [file s1]
